# Supplementary material for: Response of Collembola and Acari communities to summer flooding in a grassland plant diversity experiment
Source: PubMed Central journal article supplement (PMC6117009; doi:10.1371/journal.pone.0202862), 2018-08-30
Supplement: pone.0202862.s002.pdf [file pone.0202862.s002.pdf]

| Family            | Species                                               | Abbrev. | November 2010 | July 2013 | October 2013 |
|-------------------|-------------------------------------------------------|---------|---------------|-----------|--------------|
| Brachystomellidae | <i>Brachystomella parvula</i> (Schaeffer, 1896)       | Brapar  | 4             | -         | 19           |
| Entomobryidae     | <i>Entomobrya lanuginosa</i> (Nicolet, 1842)          | Entlan  | 5             | -         | -            |
|                   | <i>Entomobrya multifasciata</i> (Tullberg, 1871)      | Entmul  | 2             | -         | -            |
|                   | <i>Heteromurus nitidus</i> (Templeton, 1835)          | Hetnit  | 1             | -         | 1            |
|                   | <i>Lepidocyrtus cyaneus</i> (Tullberg, 1871)          | Lepcya  | 579           | 27        | 1,216        |
|                   | <i>Lepidocyrtus lanuginosus</i> (Gmelin, 1790)        | Leplan  | 13            | 6         | 102          |
|                   | <i>Pseudosinella alba</i> (Packard, 1873)             | Psealb  | 73            | -         | 5            |
|                   | <i>Pseudosinella immaculata</i> (Lie-pettersen, 1897) | Pseimm  | 78            | -         | -            |
|                   | <i>Sinella curviseta</i> (Brook, 1882)                | Sincur  | -             | -         | 59           |
|                   | <i>Willowsia buski</i> (Lubbock, 1870)                | Wilbus  | 2             | 6         | 12           |
| Hypogastruridae   | <i>Ceratophysella denticulata</i> (Bagnall, 1941)     | Cerden  | 295           |           | 22           |
|                   | <i>Ceratophysella engadinensis</i> (Gisin, 1949)      | Cereng  | -             | 1         | -            |
|                   | <i>Ceratophysella succinea</i> (Gisin, 1949)          | Cersuc  | -             | -         | 9            |
|                   | <i>Hypogastrura manubrialis</i> (Tullberg, 1869)      | Hypman  | -             | 1         | -            |
| Isotomidae        | <i>Cryptopygus thermophilus</i> (Axelson, 1900)       | Crythe  | -             | -         | 364          |
|                   | <i>Desoria violacea</i> (Tullberg, 1876)              | Desvio  | -             | -         | 3            |
|                   | <i>Folsomia quadrioculata</i> (Tullberg, 1871)        | Folqua  | -             | 2         | 1            |
|                   | <i>Folsomides parvulus</i> (Stach, 1922)              | Folpar  | 47            | -         | -            |
|                   | <i>Isotoma viridis</i> (Bourlet, 1839)                | Isovir  | 57            | 11        | 262          |
|                   | <i>Isotomiella minor</i> (Schaeffer, 1896)            | Isomin  | 49            | 1         | 77           |
|                   | <i>Isotomodes productus</i> (Axelson, 1906)           | Isopro  | -             | -         | 18           |
|                   | <i>Isotomurus fucicolus</i> (Reuter, 1891)            | Isofuc  | -             | 1         | -            |
|                   | <i>Isotomurus palustris</i> (Müller, 1776)            | Isopal  | 67            | -         | -            |
|                   | <i>Parisotoma notabilis</i> (Schaeffer, 1896)         | Parnot  | 400           | 3         | 10           |
|                   | <i>Proisotoma minuta</i> (Tullberg, 1871)             | Promin  | -             | 1         | -            |
| Katiannidae       | <i>Sminthurinus aureus</i> (Lubbock, 1862)            | Smiaur  | 7             | -         | 18           |
|                   | <i>Sminthurinus elegans</i> (Fitch, 1862)             | Smiele  | 1             | -         | -            |
|                   | <i>Sminthurinus niger</i> (Lubbock, 1868)             | Sminig  | 45            | 1         | -            |
| Neanuridae        | <i>Friesea mirabilis</i> (Tullberg, 1871)             | Frimir  | 10            | -         | 1            |
|                   | <i>Micranurida pygmaea</i> (Borner, 1901)             | Micpyg  | 32            | -         | 16           |
| Neelidae          | <i>Megalothorax minimus</i> (Willem, 1900)            | Megmin  | 92            | -         | 2            |
| Onychiuridae      | <i>Onychiurus jubilaris</i> (Gisin, 1957)             | Onyjub  | 162           | -         | -            |
|                   | <i>Protaphorura armata</i> (Tullberg, 1869)           | Proarm  | -             | 4         | -            |
|                   | <i>Supraphorura furcifera</i> (Börner, 1901)          | Supfur  | 3             | -         | -            |
| Sminthuridae      | <i>Sminthurus viridis</i> (Linnaeus, 1758)            | Smivir  | -             | 1         | -            |
| Sminthurididae    | <i>Sphaeridia pumilis</i> (Krausbauer, 1898)          | Spapum  | 1             | 1         | -            |
| Tullbergiidae     | <i>Mesaphorura macrochaeta</i> (Rusek, 1976)          | Mesmac  | 498           | -         | 13           |
|                   | <i>Metaphorura affinis</i> (Börner, 1903)             | Metaff  | 47            | -         | -            |
|                   | <i>Paratullbergia macdougalli</i> (Bagnall, 1936)     | Parmac  | -             | 3         | -            |
|                   | <i>Stenaphorurella denisi</i> (Bagnall, 1935)         | Steden  | 288           | -         | 943          |
