# Supplementary material for: Response of Collembola and Acari communities to summer flooding in a grassland plant diversity experiment
Source: PubMed Central journal article supplement (PMC6117009; doi:10.1371/journal.pone.0202862), 2018-08-30
Supplement: pone.0202862.s003.pdf [file pone.0202862.s003.pdf]

S2 Table

List of Oribatida species

| Family           | Species                                                    | Abbrev. | November 2010 | July 2013 | October 2013 |
|------------------|------------------------------------------------------------|---------|---------------|-----------|--------------|
| Ceratozetidae    | <i>Ceratozetes psammophilus</i> (Horak, 2000)              | Cerpsa  | 3             | -         | 10           |
| Euphthiracaridae | <i>Rhysotritia ardua ardua</i> (Koch, 1841)                | Rhyard  | 39            | 1         | 15           |
| Hypochthoniidae  | <i>Hypochthonius rufulus</i> (Koch, 1835)                  | Hypruf  | -             | -         | 1            |
| Liebstadiidae    | <i>Liebstadia similis</i> (Michael, 1888)                  | Liesim  | 21            | -         | -            |
| Nothridae        | <i>Nothrus anauniensis</i> (Canestrini & Fanzago, 1876)    | Notana  | 2             | -         | -            |
|                  | <i>Nothrus pratensis</i> (Sellnick, 1928)                  | Notpra  | 6             | -         | -            |
| Oppiidae         | <i>Micropia minus</i> (Paoli, 1908)                        | Micmin  | -             | 10        | 1            |
|                  | <i>Oppiella nova</i> (Oudemans, 1902)                      | Opinov  | 165           | 1         | 329          |
| Oribatulidae     | <i>Oribatula excavata</i> (Berlese, 1916)                  | Oriexc  | 246           | 5         | 42           |
|                  | <i>Zygoribatula frisiae</i> (Oudemans, 1900)               | Zygfri  | -             | 2         | -            |
| Phthiracaridae   | <i>Steganacarus striculus</i> (Koch, 1836)                 | Stestr  | -             | -         | 1            |
| Protoribatidae   | <i>Protoribates capucinus</i> (Berlese, 1908)              | Procap  | -             | -         | 1            |
| Punctoribatidae  | <i>Punctoribates punctum</i> (Koch, 1839)                  | Punpun  | 20            | 4         | 28           |
| Scheloribatidae  | <i>Scheloribates (Hemileius) initialis</i> (Berlese, 1908) | Schini  | -             | 20        | -            |
|                  | <i>Scheloribates laevigatus</i> (Koch, 1835)               | Schlae  | 9             | 12        | 74           |
| Tectocephidae    | <i>Tectocephus minor</i> (Berlese, 1903)                   | Tecmin  | 2             | -         | 4            |
|                  | <i>Tectocephus velatus sarekensis</i> (Trägårdh, 1910)     | Tecsar  | 64            | 30        | 61           |
|                  | <i>Tectocephus velatus velatus</i> (Michael, 1880)         | Tecala  | 1             | -         | -            |
