# Supplementary material for: Response of Collembola and Acari communities to summer flooding in a grassland plant diversity experiment
Source: PubMed Central journal article supplement (PMC6117009; doi:10.1371/journal.pone.0202862), 2018-08-30
Supplement: pone.0202862.s004.pdf [file pone.0202862.s004.pdf]

**Dataset**

Collembola species

Type raw

Unit individuals in soil cores of 5 cm diameter and 5 cm depth

| Date          | Plot  | <i>Brachystomella parvula</i> | <i>Ceratophysella succinea</i> | <i>Ceratophysella denticulata</i> | <i>Ceratophysella engadinensis</i> | <i>Hypogastrura manubrialis</i> | <i>Lepidocyrtus cyaneus</i> | <i>Lepidocyrtus lanuginosus</i> | <i>Entomobrya lanuginosa</i> |
|---------------|-------|-------------------------------|--------------------------------|-----------------------------------|------------------------------------|---------------------------------|-----------------------------|---------------------------------|------------------------------|
| November 2010 | B1A01 | 0                             | 0                              | 0                                 | 0                                  | 0                               | 10                          | 0                               | 0                            |
| November 2010 | B1A02 | 0                             | 0                              | 1                                 | 0                                  | 0                               | 0                           | 0                               | 0                            |
| November 2010 | B1A03 | 0                             | 0                              | 0                                 | 0                                  | 0                               | 6                           | 1                               | 0                            |
| November 2010 | B1A04 | 0                             | 0                              | 0                                 | 0                                  | 0                               | 9                           | 0                               | 0                            |
| November 2010 | B1A05 | 0                             | 0                              | 1                                 | 0                                  | 0                               | 5                           | 0                               | 0                            |
| November 2010 | B1A06 | 4                             | 0                              | 0                                 | 0                                  | 0                               | 5                           | 0                               | 0                            |
| November 2010 | B1A07 | 0                             | 0                              | 7                                 | 0                                  | 0                               | 1                           | 0                               | 0                            |
| November 2010 | B1A08 | 0                             | 0                              | 1                                 | 0                                  | 0                               | 3                           | 0                               | 3                            |
| November 2010 | B1A11 | 0                             | 0                              | 0                                 | 0                                  | 0                               | 24                          | 0                               | 0                            |
| November 2010 | B1A12 | 0                             | 0                              | 0                                 | 0                                  | 0                               | 5                           | 0                               | 0                            |
| November 2010 | B1A13 | 0                             | 0                              | 0                                 | 0                                  | 0                               | 3                           | 0                               | 0                            |
| November 2010 | B1A14 | 0                             | 0                              | 1                                 | 0                                  | 0                               | 0                           | 0                               | 0                            |
| November 2010 | B1A15 | 0                             | 0                              | 0                                 | 0                                  | 0                               | 0                           | 0                               | 0                            |
| November 2010 | B1A16 | 0                             | 0                              | 11                                | 0                                  | 0                               | 8                           | 0                               | 0                            |
| November 2010 | B1A17 | 0                             | 0                              | 18                                | 0                                  | 0                               | 6                           | 0                               | 0                            |
| November 2010 | B1A18 | 0                             | 0                              | 0                                 | 0                                  | 0                               | 0                           | 0                               | 0                            |
| November 2010 | B1A19 | 0                             | 0                              | 0                                 | 0                                  | 0                               | 2                           | 9                               | 0                            |
| November 2010 | B1A20 | 0                             | 0                              | 26                                | 0                                  | 0                               | 15                          | 0                               | 0                            |
| November 2010 | B1A21 | 0                             | 0                              | 0                                 | 0                                  | 0                               | 10                          | 0                               | 0                            |
| November 2010 | B1A22 | 0                             | 0                              | 0                                 | 0                                  | 0                               | 13                          | 1                               | 0                            |
| November 2010 | B2A01 | 0                             | 0                              | 0                                 | 0                                  | 0                               | 4                           | 0                               | 0                            |
| November 2010 | B2A02 | 0                             | 0                              | 0                                 | 0                                  | 0                               | 0                           | 0                               | 0                            |
| November 2010 | B2A03 | 0                             | 0                              | 3                                 | 0                                  | 0                               | 3                           | 0                               | 0                            |
| November 2010 | B2A04 | 0                             | 0                              | 0                                 | 0                                  | 0                               | 3                           | 0                               | 0                            |
| November 2010 | B2A05 | 0                             | 0                              | 4                                 | 0                                  | 0                               | 8                           | 0                               | 0                            |
| November 2010 | B2A06 | 0                             | 0                              | 5                                 | 0                                  | 0                               | 7                           | 0                               | 0                            |
| November 2010 | B2A08 | 0                             | 0                              | 6                                 | 0                                  | 0                               | 2                           | 0                               | 0                            |
| November 2010 | B2A09 | 0                             | 0                              | 7                                 | 0                                  | 0                               | 4                           | 0                               | 0                            |
| November 2010 | B2A10 | 0                             | 0                              | 1                                 | 0                                  | 0                               | 3                           | 0                               | 0                            |
| November 2010 | B2A12 | 0                             | 0                              | 0                                 | 0                                  | 0                               | 5                           | 0                               | 0                            |
| November 2010 | B2A13 | 0                             | 0                              | 0                                 | 0                                  | 0                               | 7                           | 0                               | 0                            |

| Date          | Plot  | <i>Brachystomella parvula</i> | <i>Ceratophysella succinea</i> | <i>Ceratophysella denticulata</i> | <i>Ceratophysella engadinensis</i> | <i>Hypogastrura manubrialis</i> | <i>Lepidocyrtus cyaneus</i> | <i>Lepidocyrtus lanuginosus</i> | <i>Entomobrya lanuginosa</i> |
|---------------|-------|-------------------------------|--------------------------------|-----------------------------------|------------------------------------|---------------------------------|-----------------------------|---------------------------------|------------------------------|
| November 2010 | B2A14 | 0                             | 0                              | 7                                 | 0                                  | 0                               | 0                           | 0                               | 0                            |
| November 2010 | B2A15 | 0                             | 0                              | 0                                 | 0                                  | 0                               | 9                           | 0                               | 0                            |
| November 2010 | B2A16 | 0                             | 0                              | 5                                 | 0                                  | 0                               | 6                           | 0                               | 0                            |
| November 2010 | B2A17 | 0                             | 0                              | 0                                 | 0                                  | 0                               | 15                          | 0                               | 0                            |
| November 2010 | B2A18 | 0                             | 0                              | 47                                | 0                                  | 0                               | 18                          | 0                               | 0                            |
| November 2010 | B2A19 | 0                             | 0                              | 1                                 | 0                                  | 0                               | 0                           | 0                               | 0                            |
| November 2010 | B2A20 | 0                             | 0                              | 61                                | 0                                  | 0                               | 11                          | 0                               | 0                            |
| November 2010 | B2A21 | 0                             | 0                              | 0                                 | 0                                  | 0                               | 4                           | 0                               | 0                            |
| November 2010 | B2A22 | 0                             | 0                              | 0                                 | 0                                  | 0                               | 0                           | 0                               | 0                            |
| November 2010 | B3A01 | 0                             | 0                              | 0                                 | 0                                  | 0                               | 9                           | 0                               | 0                            |
| November 2010 | B3A02 | 0                             | 0                              | 0                                 | 0                                  | 0                               | 4                           | 0                               | 0                            |
| November 2010 | B3A03 | 0                             | 0                              | 0                                 | 0                                  | 0                               | 0                           | 0                               | 0                            |
| November 2010 | B3A04 | 0                             | 0                              | 0                                 | 0                                  | 0                               | 23                          | 0                               | 0                            |
| November 2010 | B3A05 | 0                             | 0                              | 7                                 | 0                                  | 0                               | 7                           | 0                               | 0                            |
| November 2010 | B3A06 | 0                             | 0                              | 0                                 | 0                                  | 0                               | 20                          | 0                               | 0                            |
| November 2010 | B3A07 | 0                             | 0                              | 0                                 | 0                                  | 0                               | 0                           | 0                               | 0                            |
| November 2010 | B3A08 | 0                             | 0                              | 26                                | 0                                  | 0                               | 4                           | 0                               | 0                            |
| November 2010 | B3A09 | 0                             | 0                              | 22                                | 0                                  | 0                               | 6                           | 0                               | 0                            |
| November 2010 | B3A11 | 0                             | 0                              | 3                                 | 0                                  | 0                               | 2                           | 0                               | 0                            |
| November 2010 | B3A12 | 0                             | 0                              | 0                                 | 0                                  | 0                               | 8                           | 0                               | 1                            |
| November 2010 | B3A13 | 0                             | 0                              | 0                                 | 0                                  | 0                               | 10                          | 0                               | 0                            |
| November 2010 | B3A14 | 0                             | 0                              | 0                                 | 0                                  | 0                               | 5                           | 2                               | 0                            |
| November 2010 | B3A16 | 0                             | 0                              | 0                                 | 0                                  | 0                               | 3                           | 0                               | 0                            |
| November 2010 | B3A17 | 0                             | 0                              | 0                                 | 0                                  | 0                               | 3                           | 0                               | 0                            |
| November 2010 | B3A19 | 0                             | 0                              | 11                                | 0                                  | 0                               | 8                           | 0                               | 0                            |
| November 2010 | B3A20 | 0                             | 0                              | 0                                 | 0                                  | 0                               | 22                          | 0                               | 0                            |
| November 2010 | B3A21 | 0                             | 0                              | 0                                 | 0                                  | 0                               | 0                           | 0                               | 0                            |
| November 2010 | B3A22 | 0                             | 0                              | 0                                 | 0                                  | 0                               | 22                          | 0                               | 0                            |
| November 2010 | B3A23 | 0                             | 0                              | 0                                 | 0                                  | 0                               | 15                          | 0                               | 0                            |
| November 2010 | B3A24 | 0                             | 0                              | 0                                 | 0                                  | 0                               | 36                          | 0                               | 0                            |
| November 2010 | B4A01 | 0                             | 0                              | 0                                 | 0                                  | 0                               | 0                           | 0                               | 0                            |
| November 2010 | B4A02 | 0                             | 0                              | 0                                 | 0                                  | 0                               | 2                           | 0                               | 0                            |
| November 2010 | B4A04 | 0                             | 0                              | 0                                 | 0                                  | 0                               | 27                          | 0                               | 0                            |
| November 2010 | B4A06 | 0                             | 0                              | 0                                 | 0                                  | 0                               | 2                           | 0                               | 0                            |
| November 2010 | B4A07 | 0                             | 0                              | 0                                 | 0                                  | 0                               | 5                           | 0                               | 0                            |
| November 2010 | B4A08 | 0                             | 0                              | 0                                 | 0                                  | 0                               | 3                           | 0                               | 0                            |





| Date         | Plot  | <i>Brachystomella parvula</i> | <i>Ceratophysella succinea</i> | <i>Ceratophysella denticulata</i> | <i>Ceratophysella engadinensis</i> | <i>Hypogastrura manubrialis</i> | <i>Lepidocyrtus cyaneus</i> | <i>Lepidocyrtus lanuginosus</i> | <i>Entomobrya lanuginosa</i> |
|--------------|-------|-------------------------------|--------------------------------|-----------------------------------|------------------------------------|---------------------------------|-----------------------------|---------------------------------|------------------------------|
| July 2013    | B3A23 | 0                             | 0                              | 0                                 | 0                                  | 0                               | 0                           | 0                               | 0                            |
| July 2013    | B3A24 | 0                             | 0                              | 0                                 | 0                                  | 0                               | 0                           | 0                               | 0                            |
| July 2013    | B4A01 | 0                             | 0                              | 0                                 | 0                                  | 0                               | 0                           | 0                               | 0                            |
| July 2013    | B4A02 | 0                             | 0                              | 0                                 | 0                                  | 0                               | 0                           | 0                               | 0                            |
| July 2013    | B4A04 | 0                             | 0                              | 0                                 | 0                                  | 0                               | 0                           | 0                               | 0                            |
| July 2013    | B4A06 | 0                             | 0                              | 0                                 | 0                                  | 0                               | 0                           | 0                               | 0                            |
| July 2013    | B4A07 | 0                             | 0                              | 0                                 | 0                                  | 0                               | 0                           | 0                               | 0                            |
| July 2013    | B4A08 | 0                             | 0                              | 0                                 | 0                                  | 0                               | 0                           | 0                               | 0                            |
| July 2013    | B4A09 | 0                             | 0                              | 0                                 | 0                                  | 0                               | 10                          | 2                               | 0                            |
| July 2013    | B4A10 | 0                             | 0                              | 0                                 | 0                                  | 0                               | 1                           | 0                               | 0                            |
| July 2013    | B4A11 | 0                             | 0                              | 0                                 | 0                                  | 0                               | 0                           | 0                               | 0                            |
| July 2013    | B4A12 | 0                             | 0                              | 0                                 | 0                                  | 0                               | 0                           | 0                               | 0                            |
| July 2013    | B4A13 | 0                             | 0                              | 0                                 | 0                                  | 0                               | 0                           | 0                               | 0                            |
| July 2013    | B4A14 | 0                             | 0                              | 0                                 | 0                                  | 0                               | 0                           | 0                               | 0                            |
| July 2013    | B4A15 | 0                             | 0                              | 0                                 | 0                                  | 0                               | 0                           | 0                               | 0                            |
| July 2013    | B4A16 | 0                             | 0                              | 0                                 | 0                                  | 0                               | 0                           | 0                               | 0                            |
| July 2013    | B4A17 | 0                             | 0                              | 0                                 | 0                                  | 0                               | 0                           | 0                               | 0                            |
| July 2013    | B4A18 | 0                             | 0                              | 0                                 | 0                                  | 0                               | 1                           | 0                               | 0                            |
| July 2013    | B4A20 | 0                             | 0                              | 0                                 | 0                                  | 0                               | 0                           | 0                               | 0                            |
| July 2013    | B4A21 | 0                             | 0                              | 0                                 | 0                                  | 0                               | 1                           | 0                               | 0                            |
| July 2013    | B4A22 | 0                             | 0                              | 0                                 | 0                                  | 0                               | 0                           | 0                               | 0                            |
| October 2013 | B1A01 | 1                             | 0                              | 0                                 | 0                                  | 0                               | 22                          | 0                               | 0                            |
| October 2013 | B1A02 | 0                             | 0                              | 0                                 | 0                                  | 0                               | 4                           | 0                               | 0                            |
| October 2013 | B1A03 | 0                             | 0                              | 0                                 | 0                                  | 0                               | 2                           | 0                               | 0                            |
| October 2013 | B1A04 | 0                             | 0                              | 0                                 | 0                                  | 0                               | 14                          | 0                               | 0                            |
| October 2013 | B1A05 | 0                             | 0                              | 0                                 | 0                                  | 0                               | 0                           | 0                               | 0                            |
| October 2013 | B1A06 | 0                             | 0                              | 0                                 | 0                                  | 0                               | 7                           | 3                               | 0                            |
| October 2013 | B1A07 | 2                             | 0                              | 1                                 | 0                                  | 0                               | 40                          | 7                               | 0                            |
| October 2013 | B1A08 | 0                             | 0                              | 0                                 | 0                                  | 0                               | 7                           | 0                               | 0                            |
| October 2013 | B1A11 | 0                             | 0                              | 0                                 | 0                                  | 0                               | 2                           | 0                               | 0                            |
| October 2013 | B1A12 | 0                             | 0                              | 0                                 | 0                                  | 0                               | 1                           | 0                               | 0                            |
| October 2013 | B1A13 | 0                             | 0                              | 0                                 | 0                                  | 0                               | 0                           | 0                               | 0                            |
| October 2013 | B1A14 | 0                             | 0                              | 1                                 | 0                                  | 0                               | 10                          | 0                               | 0                            |
| October 2013 | B1A15 | 0                             | 0                              | 0                                 | 0                                  | 0                               | 3                           | 0                               | 0                            |
| October 2013 | B1A16 | 0                             | 1                              | 0                                 | 0                                  | 0                               | 5                           | 0                               | 0                            |
| October 2013 | B1A17 | 0                             | 0                              | 0                                 | 0                                  | 0                               | 7                           | 0                               | 0                            |

| Date         | Plot  | <i>Brachystomella parvula</i> | <i>Ceratophysella succinea</i> | <i>Ceratophysella denticulata</i> | <i>Ceratophysella engadinensis</i> | <i>Hypogastrura manubrialis</i> | <i>Lepidocyrtus cyaneus</i> | <i>Lepidocyrtus lanuginosus</i> | <i>Entomobrya lanuginosa</i> |
|--------------|-------|-------------------------------|--------------------------------|-----------------------------------|------------------------------------|---------------------------------|-----------------------------|---------------------------------|------------------------------|
| October 2013 | B1A18 | 0                             | 0                              | 0                                 | 0                                  | 0                               | 19                          | 0                               | 0                            |
| October 2013 | B1A19 | 1                             | 0                              | 0                                 | 0                                  | 0                               | 7                           | 0                               | 0                            |
| October 2013 | B1A20 | 0                             | 3                              | 0                                 | 0                                  | 0                               | 3                           | 0                               | 0                            |
| October 2013 | B1A21 | 0                             | 0                              | 0                                 | 0                                  | 0                               | 8                           | 1                               | 0                            |
| October 2013 | B1A22 | 0                             | 0                              | 0                                 | 0                                  | 0                               | 6                           | 0                               | 0                            |
| October 2013 | B2A01 | 0                             | 2                              | 0                                 | 0                                  | 0                               | 6                           | 2                               | 0                            |
| October 2013 | B2A02 | 7                             | 1                              | 4                                 | 0                                  | 0                               | 57                          | 0                               | 0                            |
| October 2013 | B2A03 | 0                             | 0                              | 0                                 | 0                                  | 0                               | 7                           | 0                               | 0                            |
| October 2013 | B2A04 | 0                             | 0                              | 0                                 | 0                                  | 0                               | 3                           | 0                               | 0                            |
| October 2013 | B2A05 | 0                             | 0                              | 0                                 | 0                                  | 0                               | 1                           | 0                               | 0                            |
| October 2013 | B2A06 | 0                             | 0                              | 0                                 | 0                                  | 0                               | 1                           | 0                               | 0                            |
| October 2013 | B2A08 | 0                             | 0                              | 0                                 | 0                                  | 0                               | 4                           | 1                               | 0                            |
| October 2013 | B2A09 | 0                             | 0                              | 1                                 | 0                                  | 0                               | 2                           | 0                               | 0                            |
| October 2013 | B2A10 | 0                             | 0                              | 0                                 | 0                                  | 0                               | 8                           | 0                               | 0                            |
| October 2013 | B2A12 | 0                             | 0                              | 0                                 | 0                                  | 0                               | 15                          | 0                               | 0                            |
| October 2013 | B2A13 | 0                             | 0                              | 0                                 | 0                                  | 0                               | 2                           | 0                               | 0                            |
| October 2013 | B2A14 | 0                             | 0                              | 0                                 | 0                                  | 0                               | 4                           | 0                               | 0                            |
| October 2013 | B2A15 | 0                             | 0                              | 0                                 | 0                                  | 0                               | 19                          | 0                               | 0                            |
| October 2013 | B2A16 | 0                             | 0                              | 0                                 | 0                                  | 0                               | 39                          | 1                               | 0                            |
| October 2013 | B2A17 | 0                             | 0                              | 0                                 | 0                                  | 0                               | 12                          | 0                               | 0                            |
| October 2013 | B2A18 | 0                             | 0                              | 0                                 | 0                                  | 0                               | 0                           | 0                               | 0                            |
| October 2013 | B2A19 | 0                             | 0                              | 0                                 | 0                                  | 0                               | 39                          | 0                               | 0                            |
| October 2013 | B2A20 | 0                             | 0                              | 0                                 | 0                                  | 0                               | 1                           | 1                               | 0                            |
| October 2013 | B2A21 | 0                             | 0                              | 0                                 | 0                                  | 0                               | 8                           | 1                               | 0                            |
| October 2013 | B2A22 | 0                             | 0                              | 0                                 | 0                                  | 0                               | 72                          | 18                              | 0                            |
| October 2013 | B3A01 | 0                             | 0                              | 0                                 | 0                                  | 0                               | 62                          | 4                               | 0                            |
| October 2013 | B3A02 | 0                             | 0                              | 0                                 | 0                                  | 0                               | 22                          | 5                               | 0                            |
| October 2013 | B3A03 | 0                             | 0                              | 0                                 | 0                                  | 0                               | 1                           | 2                               | 0                            |
| October 2013 | B3A04 | 0                             | 0                              | 0                                 | 0                                  | 0                               | 1                           | 1                               | 0                            |
| October 2013 | B3A05 | 0                             | 0                              | 0                                 | 0                                  | 0                               | 27                          | 3                               | 0                            |
| October 2013 | B3A06 | 0                             | 0                              | 0                                 | 0                                  | 0                               | 20                          | 4                               | 0                            |
| October 2013 | B3A07 | 0                             | 0                              | 0                                 | 0                                  | 0                               | 101                         | 8                               | 0                            |
| October 2013 | B3A08 | 0                             | 0                              | 0                                 | 0                                  | 0                               | 3                           | 0                               | 0                            |
| October 2013 | B3A09 | 0                             | 0                              | 0                                 | 0                                  | 0                               | 2                           | 0                               | 0                            |
| October 2013 | B3A11 | 0                             | 0                              | 0                                 | 0                                  | 0                               | 9                           | 0                               | 0                            |
| October 2013 | B3A12 | 0                             | 0                              | 0                                 | 0                                  | 0                               | 37                          | 0                               | 0                            |

| Date         | Plot  | <i>Brachystomella parvula</i> | <i>Ceratophysella succinea</i> | <i>Ceratophysella denticulata</i> | <i>Ceratophysella engadinensis</i> | <i>Hypogastrura manubrialis</i> | <i>Lepidocyrtus cyaneus</i> | <i>Lepidocyrtus lanuginosus</i> | <i>Entomobrya lanuginosa</i> |
|--------------|-------|-------------------------------|--------------------------------|-----------------------------------|------------------------------------|---------------------------------|-----------------------------|---------------------------------|------------------------------|
| October 2013 | B3A13 | 0                             | 0                              | 0                                 | 0                                  | 0                               | 6                           | 0                               | 0                            |
| October 2013 | B3A14 | 0                             | 1                              | 0                                 | 0                                  | 0                               | 28                          | 4                               | 0                            |
| October 2013 | B3A16 | 0                             | 0                              | 0                                 | 0                                  | 0                               | 9                           | 0                               | 0                            |
| October 2013 | B3A17 | 0                             | 0                              | 0                                 | 0                                  | 0                               | 20                          | 5                               | 0                            |
| October 2013 | B3A19 | 0                             | 0                              | 0                                 | 0                                  | 0                               | 70                          | 0                               | 0                            |
| October 2013 | B3A20 | 0                             | 0                              | 0                                 | 0                                  | 0                               | 1                           | 2                               | 0                            |
| October 2013 | B3A21 | 0                             | 0                              | 0                                 | 0                                  | 0                               | 4                           | 0                               | 0                            |
| October 2013 | B3A22 | 0                             | 0                              | 0                                 | 0                                  | 0                               | 50                          | 8                               | 0                            |
| October 2013 | B3A23 | 0                             | 0                              | 0                                 | 0                                  | 0                               | 4                           | 1                               | 0                            |
| October 2013 | B3A24 | 0                             | 0                              | 0                                 | 0                                  | 0                               | 6                           | 4                               | 0                            |
| October 2013 | B4A01 | 0                             | 0                              | 0                                 | 0                                  | 0                               | 16                          | 0                               | 0                            |
| October 2013 | B4A02 | 0                             | 0                              | 1                                 | 0                                  | 0                               | 51                          | 2                               | 0                            |
| October 2013 | B4A04 | 0                             | 0                              | 0                                 | 0                                  | 0                               | 3                           | 0                               | 0                            |
| October 2013 | B4A06 | 0                             | 0                              | 0                                 | 0                                  | 0                               | 12                          | 1                               | 0                            |
| October 2013 | B4A07 | 0                             | 0                              | 0                                 | 0                                  | 0                               | 22                          | 4                               | 0                            |
| October 2013 | B4A08 | 1                             | 0                              | 0                                 | 0                                  | 0                               | 80                          | 4                               | 0                            |
| October 2013 | B4A09 | 0                             | 0                              | 13                                | 0                                  | 0                               | 5                           | 0                               | 0                            |
| October 2013 | B4A10 | 1                             | 0                              | 0                                 | 0                                  | 0                               | 0                           | 0                               | 0                            |
| October 2013 | B4A11 | 0                             | 0                              | 0                                 | 0                                  | 0                               | 2                           | 0                               | 0                            |
| October 2013 | B4A12 | 0                             | 0                              | 0                                 | 0                                  | 0                               | 3                           | 0                               | 0                            |
| October 2013 | B4A13 | 0                             | 0                              | 0                                 | 0                                  | 0                               | 0                           | 0                               | 0                            |
| October 2013 | B4A14 | 0                             | 0                              | 1                                 | 0                                  | 0                               | 20                          | 2                               | 0                            |
| October 2013 | B4A15 | 5                             | 0                              | 0                                 | 0                                  | 0                               | 25                          | 0                               | 0                            |
| October 2013 | B4A16 | 0                             | 0                              | 0                                 | 0                                  | 0                               | 11                          | 0                               | 0                            |
| October 2013 | B4A17 | 0                             | 0                              | 0                                 | 0                                  | 0                               | 4                           | 0                               | 0                            |
| October 2013 | B4A18 | 1                             | 0                              | 0                                 | 0                                  | 0                               | 4                           | 3                               | 0                            |
| October 2013 | B4A20 | 0                             | 0                              | 0                                 | 0                                  | 0                               | 2                           | 0                               | 0                            |
| October 2013 | B4A21 | 0                             | 1                              | 0                                 | 0                                  | 0                               | 0                           | 0                               | 0                            |
| October 2013 | B4A22 | 0                             | 0                              | 0                                 | 0                                  | 0                               | 6                           | 0                               | 0                            |













| Date         | Plot  | <i>Entomobrya multifusciata</i> | <i>Heteromurus nitidus</i> | <i>Pseudosinella alba</i> | <i>Sinella curviseta</i> | <i>Willosia buski</i> | <i>Pseudosinella immaculata</i> | <i>Frisea mirabilis</i> | <i>Micranurida pygmea</i> | <i>Folsomides parvulus</i> | <i>Isotoma viridis</i> |
|--------------|-------|---------------------------------|----------------------------|---------------------------|--------------------------|-----------------------|---------------------------------|-------------------------|---------------------------|----------------------------|------------------------|
| October 2013 | B1A18 | 0                               | 0                          | 0                         | 0                        | 0                     | 0                               | 0                       | 0                         | 0                          | 1                      |
| October 2013 | B1A19 | 0                               | 0                          | 0                         | 1                        | 0                     | 0                               | 0                       | 1                         | 0                          | 0                      |
| October 2013 | B1A20 | 0                               | 0                          | 0                         | 1                        | 0                     | 0                               | 0                       | 0                         | 0                          | 0                      |
| October 2013 | B1A21 | 0                               | 0                          | 0                         | 0                        | 0                     | 0                               | 0                       | 0                         | 0                          | 1                      |
| October 2013 | B1A22 | 0                               | 0                          | 0                         | 0                        | 0                     | 0                               | 0                       | 0                         | 0                          | 0                      |
| October 2013 | B2A01 | 0                               | 0                          | 0                         | 1                        | 0                     | 0                               | 0                       | 0                         | 0                          | 1                      |
| October 2013 | B2A02 | 0                               | 0                          | 0                         | 0                        | 0                     | 0                               | 0                       | 3                         | 0                          | 2                      |
| October 2013 | B2A03 | 0                               | 0                          | 0                         | 0                        | 0                     | 0                               | 0                       | 0                         | 0                          | 0                      |
| October 2013 | B2A04 | 0                               | 0                          | 0                         | 1                        | 0                     | 0                               | 0                       | 0                         | 0                          | 0                      |
| October 2013 | B2A05 | 0                               | 0                          | 0                         | 0                        | 0                     | 0                               | 1                       | 0                         | 0                          | 12                     |
| October 2013 | B2A06 | 0                               | 0                          | 0                         | 3                        | 0                     | 0                               | 0                       | 0                         | 0                          | 0                      |
| October 2013 | B2A08 | 0                               | 0                          | 0                         | 1                        | 0                     | 0                               | 0                       | 0                         | 0                          | 4                      |
| October 2013 | B2A09 | 0                               | 0                          | 0                         | 0                        | 0                     | 0                               | 0                       | 0                         | 0                          | 0                      |
| October 2013 | B2A10 | 0                               | 0                          | 0                         | 0                        | 0                     | 0                               | 0                       | 0                         | 0                          | 0                      |
| October 2013 | B2A12 | 0                               | 0                          | 0                         | 1                        | 0                     | 0                               | 0                       | 0                         | 0                          | 0                      |
| October 2013 | B2A13 | 0                               | 0                          | 0                         | 2                        | 0                     | 0                               | 0                       | 0                         | 0                          | 1                      |
| October 2013 | B2A14 | 0                               | 0                          | 0                         | 1                        | 0                     | 0                               | 0                       | 0                         | 0                          | 4                      |
| October 2013 | B2A15 | 0                               | 0                          | 0                         | 2                        | 2                     | 0                               | 0                       | 0                         | 0                          | 0                      |
| October 2013 | B2A16 | 0                               | 0                          | 0                         | 3                        | 0                     | 0                               | 0                       | 0                         | 0                          | 32                     |
| October 2013 | B2A17 | 0                               | 0                          | 0                         | 0                        | 1                     | 0                               | 0                       | 0                         | 0                          | 3                      |
| October 2013 | B2A18 | 0                               | 0                          | 0                         | 0                        | 1                     | 0                               | 0                       | 0                         | 0                          | 21                     |
| October 2013 | B2A19 | 0                               | 0                          | 0                         | 0                        | 0                     | 0                               | 0                       | 0                         | 0                          | 30                     |
| October 2013 | B2A20 | 0                               | 0                          | 0                         | 0                        | 0                     | 0                               | 0                       | 0                         | 0                          | 1                      |
| October 2013 | B2A21 | 0                               | 0                          | 0                         | 3                        | 0                     | 0                               | 0                       | 0                         | 0                          | 2                      |
| October 2013 | B2A22 | 0                               | 0                          | 0                         | 0                        | 0                     | 0                               | 0                       | 0                         | 0                          | 20                     |
| October 2013 | B3A01 | 0                               | 0                          | 0                         | 0                        | 0                     | 0                               | 0                       | 0                         | 0                          | 2                      |
| October 2013 | B3A02 | 0                               | 0                          | 0                         | 3                        | 0                     | 0                               | 0                       | 0                         | 0                          | 0                      |
| October 2013 | B3A03 | 0                               | 0                          | 0                         | 0                        | 0                     | 0                               | 0                       | 0                         | 0                          | 0                      |
| October 2013 | B3A04 | 0                               | 0                          | 0                         | 0                        | 0                     | 0                               | 0                       | 0                         | 0                          | 0                      |
| October 2013 | B3A05 | 0                               | 0                          | 0                         | 0                        | 0                     | 0                               | 0                       | 0                         | 0                          | 0                      |
| October 2013 | B3A06 | 0                               | 0                          | 0                         | 0                        | 0                     | 0                               | 0                       | 0                         | 0                          | 0                      |
| October 2013 | B3A07 | 0                               | 0                          | 0                         | 0                        | 0                     | 0                               | 0                       | 0                         | 0                          | 6                      |
| October 2013 | B3A08 | 0                               | 0                          | 0                         | 0                        | 0                     | 0                               | 0                       | 0                         | 0                          | 5                      |
| October 2013 | B3A09 | 0                               | 0                          | 0                         | 2                        | 0                     | 0                               | 0                       | 0                         | 0                          | 0                      |
| October 2013 | B3A11 | 0                               | 0                          | 0                         | 0                        | 0                     | 0                               | 0                       | 0                         | 0                          | 4                      |
| October 2013 | B3A12 | 0                               | 0                          | 0                         | 0                        | 5                     | 0                               | 0                       | 0                         | 0                          | 16                     |





| Date          | Plot  | <i>Cryptopygus thermophilus</i> | <i>Desoria violacea</i> | <i>Isotomiella minor</i> | <i>Isotomodes productus</i> | <i>Folsomia quadrioculata</i> | <i>Isotumurus palustris</i> | <i>Parisotoma notabilis</i> | <i>Isotomurus fucicolus</i> | <i>Proisotoma minuta</i> |
|---------------|-------|---------------------------------|-------------------------|--------------------------|-----------------------------|-------------------------------|-----------------------------|-----------------------------|-----------------------------|--------------------------|
| November 2010 | B2A14 | 0                               | 0                       | 2                        | 0                           | 0                             | 0                           | 0                           | 0                           | 0                        |
| November 2010 | B2A15 | 0                               | 0                       | 0                        | 0                           | 0                             | 0                           | 0                           | 0                           | 0                        |
| November 2010 | B2A16 | 0                               | 0                       | 0                        | 0                           | 0                             | 0                           | 1                           | 0                           | 0                        |
| November 2010 | B2A17 | 0                               | 0                       | 0                        | 0                           | 0                             | 0                           | 0                           | 0                           | 0                        |
| November 2010 | B2A18 | 0                               | 0                       | 0                        | 0                           | 0                             | 0                           | 11                          | 0                           | 0                        |
| November 2010 | B2A19 | 0                               | 0                       | 0                        | 0                           | 0                             | 0                           | 0                           | 0                           | 0                        |
| November 2010 | B2A20 | 0                               | 0                       | 0                        | 0                           | 0                             | 0                           | 7                           | 0                           | 0                        |
| November 2010 | B2A21 | 0                               | 0                       | 0                        | 0                           | 0                             | 0                           | 6                           | 0                           | 0                        |
| November 2010 | B2A22 | 0                               | 0                       | 0                        | 0                           | 0                             | 0                           | 0                           | 0                           | 0                        |
| November 2010 | B3A01 | 0                               | 0                       | 0                        | 0                           | 0                             | 0                           | 0                           | 0                           | 0                        |
| November 2010 | B3A02 | 0                               | 0                       | 0                        | 0                           | 0                             | 0                           | 2                           | 0                           | 0                        |
| November 2010 | B3A03 | 0                               | 0                       | 0                        | 0                           | 0                             | 0                           | 0                           | 0                           | 0                        |
| November 2010 | B3A04 | 0                               | 0                       | 0                        | 0                           | 0                             | 0                           | 20                          | 0                           | 0                        |
| November 2010 | B3A05 | 0                               | 0                       | 0                        | 0                           | 0                             | 0                           | 5                           | 0                           | 0                        |
| November 2010 | B3A06 | 0                               | 0                       | 0                        | 0                           | 0                             | 0                           | 4                           | 0                           | 0                        |
| November 2010 | B3A07 | 0                               | 0                       | 0                        | 0                           | 0                             | 0                           | 0                           | 0                           | 0                        |
| November 2010 | B3A08 | 0                               | 0                       | 2                        | 0                           | 0                             | 0                           | 7                           | 0                           | 0                        |
| November 2010 | B3A09 | 0                               | 0                       | 0                        | 0                           | 0                             | 2                           | 16                          | 0                           | 0                        |
| November 2010 | B3A11 | 0                               | 0                       | 0                        | 0                           | 0                             | 0                           | 10                          | 0                           | 0                        |
| November 2010 | B3A12 | 0                               | 0                       | 4                        | 0                           | 0                             | 1                           | 1                           | 0                           | 0                        |
| November 2010 | B3A13 | 0                               | 0                       | 0                        | 0                           | 0                             | 0                           | 11                          | 0                           | 0                        |
| November 2010 | B3A14 | 0                               | 0                       | 1                        | 0                           | 0                             | 3                           | 10                          | 0                           | 0                        |
| November 2010 | B3A16 | 0                               | 0                       | 6                        | 0                           | 0                             | 0                           | 3                           | 0                           | 0                        |
| November 2010 | B3A17 | 0                               | 0                       | 0                        | 0                           | 0                             | 0                           | 5                           | 0                           | 0                        |
| November 2010 | B3A19 | 0                               | 0                       | 1                        | 0                           | 0                             | 0                           | 22                          | 0                           | 0                        |
| November 2010 | B3A20 | 0                               | 0                       | 0                        | 0                           | 0                             | 0                           | 0                           | 0                           | 0                        |
| November 2010 | B3A21 | 0                               | 0                       | 0                        | 0                           | 0                             | 0                           | 0                           | 0                           | 0                        |
| November 2010 | B3A22 | 0                               | 0                       | 1                        | 0                           | 0                             | 1                           | 2                           | 0                           | 0                        |
| November 2010 | B3A23 | 0                               | 0                       | 7                        | 0                           | 0                             | 4                           | 13                          | 0                           | 0                        |
| November 2010 | B3A24 | 0                               | 0                       | 0                        | 0                           | 0                             | 4                           | 1                           | 0                           | 0                        |
| November 2010 | B4A01 | 0                               | 0                       | 0                        | 0                           | 0                             | 6                           | 7                           | 0                           | 0                        |
| November 2010 | B4A02 | 0                               | 0                       | 0                        | 0                           | 0                             | 0                           | 0                           | 0                           | 0                        |
| November 2010 | B4A04 | 0                               | 0                       | 0                        | 0                           | 0                             | 5                           | 8                           | 0                           | 0                        |
| November 2010 | B4A06 | 0                               | 0                       | 0                        | 0                           | 0                             | 0                           | 1                           | 0                           | 0                        |
| November 2010 | B4A07 | 0                               | 0                       | 0                        | 0                           | 0                             | 0                           | 0                           | 0                           | 0                        |
| November 2010 | B4A08 | 0                               | 0                       | 0                        | 0                           | 0                             | 4                           | 1                           | 0                           | 0                        |







| Date         | Plot  | <i>Cryptopygus thermophilus</i> | <i>Desoria violacea</i> | <i>Isotomiella minor</i> | <i>Isotomodes productus</i> | <i>Folsomia quadrioculata</i> | <i>Isotomurus palustris</i> | <i>Parisotoma notabilis</i> | <i>Isotomurus fucicolus</i> | <i>Proisotoma minuta</i> |
|--------------|-------|---------------------------------|-------------------------|--------------------------|-----------------------------|-------------------------------|-----------------------------|-----------------------------|-----------------------------|--------------------------|
| July 2013    | B3A23 | 0                               | 0                       | 0                        | 0                           | 0                             | 0                           | 0                           | 1                           | 0                        |
| July 2013    | B3A24 | 0                               | 0                       | 0                        | 0                           | 0                             | 0                           | 0                           | 0                           | 0                        |
| July 2013    | B4A01 | 0                               | 0                       | 0                        | 0                           | 0                             | 0                           | 0                           | 0                           | 0                        |
| July 2013    | B4A02 | 0                               | 0                       | 0                        | 0                           | 1                             | 0                           | 0                           | 0                           | 0                        |
| July 2013    | B4A04 | 0                               | 0                       | 0                        | 0                           | 0                             | 0                           | 0                           | 0                           | 1                        |
| July 2013    | B4A06 | 0                               | 0                       | 0                        | 0                           | 0                             | 0                           | 1                           | 0                           | 0                        |
| July 2013    | B4A07 | 0                               | 0                       | 0                        | 0                           | 0                             | 0                           | 0                           | 0                           | 0                        |
| July 2013    | B4A08 | 0                               | 0                       | 0                        | 0                           | 0                             | 0                           | 0                           | 0                           | 0                        |
| July 2013    | B4A09 | 0                               | 0                       | 0                        | 0                           | 0                             | 0                           | 0                           | 0                           | 0                        |
| July 2013    | B4A10 | 0                               | 0                       | 0                        | 0                           | 0                             | 0                           | 0                           | 0                           | 0                        |
| July 2013    | B4A11 | 0                               | 0                       | 0                        | 0                           | 0                             | 0                           | 0                           | 0                           | 0                        |
| July 2013    | B4A12 | 0                               | 0                       | 0                        | 0                           | 0                             | 0                           | 0                           | 0                           | 0                        |
| July 2013    | B4A13 | 0                               | 0                       | 0                        | 0                           | 0                             | 0                           | 0                           | 0                           | 0                        |
| July 2013    | B4A14 | 0                               | 0                       | 0                        | 0                           | 0                             | 0                           | 0                           | 0                           | 0                        |
| July 2013    | B4A15 | 0                               | 0                       | 0                        | 0                           | 0                             | 0                           | 0                           | 0                           | 0                        |
| July 2013    | B4A16 | 0                               | 0                       | 0                        | 0                           | 0                             | 0                           | 0                           | 0                           | 0                        |
| July 2013    | B4A17 | 0                               | 0                       | 0                        | 0                           | 0                             | 0                           | 0                           | 0                           | 0                        |
| July 2013    | B4A18 | 0                               | 0                       | 0                        | 0                           | 0                             | 0                           | 0                           | 0                           | 0                        |
| July 2013    | B4A20 | 0                               | 0                       | 0                        | 0                           | 0                             | 0                           | 0                           | 0                           | 0                        |
| July 2013    | B4A21 | 0                               | 0                       | 0                        | 0                           | 0                             | 0                           | 0                           | 0                           | 0                        |
| July 2013    | B4A22 | 0                               | 0                       | 0                        | 0                           | 0                             | 0                           | 0                           | 0                           | 0                        |
| October 2013 | B1A01 | 16                              | 0                       | 0                        | 0                           | 0                             | 0                           | 5                           | 0                           | 0                        |
| October 2013 | B1A02 | 0                               | 0                       | 0                        | 0                           | 0                             | 0                           | 0                           | 0                           | 0                        |
| October 2013 | B1A03 | 19                              | 0                       | 16                       | 0                           | 0                             | 0                           | 0                           | 0                           | 0                        |
| October 2013 | B1A04 | 0                               | 0                       | 12                       | 0                           | 0                             | 0                           | 0                           | 0                           | 0                        |
| October 2013 | B1A05 | 0                               | 0                       | 0                        | 0                           | 0                             | 0                           | 0                           | 0                           | 0                        |
| October 2013 | B1A06 | 16                              | 0                       | 15                       | 18                          | 0                             | 0                           | 0                           | 0                           | 0                        |
| October 2013 | B1A07 | 23                              | 0                       | 3                        | 0                           | 0                             | 0                           | 0                           | 0                           | 0                        |
| October 2013 | B1A08 | 0                               | 1                       | 0                        | 0                           | 0                             | 0                           | 0                           | 0                           | 0                        |
| October 2013 | B1A11 | 1                               | 0                       | 0                        | 0                           | 0                             | 0                           | 0                           | 0                           | 0                        |
| October 2013 | B1A12 | 5                               | 0                       | 0                        | 0                           | 0                             | 0                           | 0                           | 0                           | 0                        |
| October 2013 | B1A13 | 0                               | 0                       | 0                        | 0                           | 0                             | 0                           | 0                           | 0                           | 0                        |
| October 2013 | B1A14 | 0                               | 0                       | 0                        | 0                           | 0                             | 0                           | 0                           | 0                           | 0                        |
| October 2013 | B1A15 | 0                               | 0                       | 1                        | 0                           | 1                             | 0                           | 0                           | 0                           | 0                        |
| October 2013 | B1A16 | 0                               | 0                       | 0                        | 0                           | 0                             | 0                           | 0                           | 0                           | 0                        |
| October 2013 | B1A17 | 13                              | 0                       | 3                        | 0                           | 0                             | 0                           | 0                           | 0                           | 0                        |





**Dataset**

Collembola species

Type raw

Unit

| Date          | Plot  | <i>Megalothorax minimus</i> | <i>Mesaphorura macrochaeta</i> | <i>Metaphorura affinis</i> | <i>Stenaphorurella denisi</i> | <i>Paratullbergia macedougalli</i> | <i>Onychiurus jubilarius</i> | <i>Supraphorura furcifera</i> | <i>Protaphorura armata</i> |
|---------------|-------|-----------------------------|--------------------------------|----------------------------|-------------------------------|------------------------------------|------------------------------|-------------------------------|----------------------------|
| November 2010 | B1A01 | 0                           | 0                              | 0                          | 0                             | 0                                  | 0                            | 0                             | 0                          |
| November 2010 | B1A02 | 0                           | 11                             | 0                          | 0                             | 0                                  | 1                            | 0                             | 0                          |
| November 2010 | B1A03 | 6                           | 5                              | 0                          | 0                             | 0                                  | 0                            | 0                             | 0                          |
| November 2010 | B1A04 | 0                           | 11                             | 0                          | 0                             | 0                                  | 4                            | 0                             | 0                          |
| November 2010 | B1A05 | 0                           | 3                              | 0                          | 0                             | 0                                  | 6                            | 0                             | 0                          |
| November 2010 | B1A06 | 0                           | 20                             | 0                          | 2                             | 0                                  | 0                            | 0                             | 0                          |
| November 2010 | B1A07 | 0                           | 18                             | 0                          | 1                             | 0                                  | 0                            | 0                             | 0                          |
| November 2010 | B1A08 | 0                           | 4                              | 0                          | 0                             | 0                                  | 0                            | 0                             | 0                          |
| November 2010 | B1A11 | 0                           | 1                              | 0                          | 0                             | 0                                  | 0                            | 0                             | 0                          |
| November 2010 | B1A12 | 0                           | 0                              | 0                          | 0                             | 0                                  | 0                            | 0                             | 0                          |
| November 2010 | B1A13 | 0                           | 3                              | 0                          | 0                             | 0                                  | 1                            | 0                             | 0                          |
| November 2010 | B1A14 | 0                           | 0                              | 0                          | 0                             | 0                                  | 0                            | 0                             | 0                          |
| November 2010 | B1A15 | 0                           | 0                              | 0                          | 0                             | 0                                  | 0                            | 0                             | 0                          |
| November 2010 | B1A16 | 0                           | 2                              | 0                          | 0                             | 0                                  | 0                            | 0                             | 0                          |
| November 2010 | B1A17 | 0                           | 33                             | 0                          | 0                             | 0                                  | 0                            | 0                             | 0                          |
| November 2010 | B1A18 | 0                           | 0                              | 0                          | 0                             | 0                                  | 0                            | 0                             | 0                          |
| November 2010 | B1A19 | 0                           | 0                              | 0                          | 16                            | 0                                  | 1                            | 0                             | 0                          |
| November 2010 | B1A20 | 1                           | 18                             | 0                          | 8                             | 0                                  | 0                            | 0                             | 0                          |
| November 2010 | B1A21 | 5                           | 1                              | 0                          | 13                            | 0                                  | 8                            | 0                             | 0                          |
| November 2010 | B1A22 | 0                           | 0                              | 0                          | 6                             | 0                                  | 0                            | 0                             | 0                          |
| November 2010 | B2A01 | 3                           | 4                              | 0                          | 6                             | 0                                  | 0                            | 0                             | 0                          |
| November 2010 | B2A02 | 0                           | 0                              | 0                          | 0                             | 0                                  | 0                            | 0                             | 0                          |
| November 2010 | B2A03 | 1                           | 3                              | 0                          | 0                             | 0                                  | 0                            | 0                             | 0                          |
| November 2010 | B2A04 | 0                           | 3                              | 0                          | 5                             | 0                                  | 0                            | 0                             | 0                          |
| November 2010 | B2A05 | 0                           | 9                              | 0                          | 6                             | 0                                  | 6                            | 0                             | 0                          |
| November 2010 | B2A06 | 0                           | 7                              | 0                          | 2                             | 0                                  | 7                            | 0                             | 0                          |
| November 2010 | B2A08 | 1                           | 20                             | 0                          | 9                             | 0                                  | 35                           | 0                             | 0                          |
| November 2010 | B2A09 | 0                           | 0                              | 0                          | 32                            | 0                                  | 8                            | 0                             | 0                          |
| November 2010 | B2A10 | 1                           | 68                             | 0                          | 0                             | 0                                  | 9                            | 0                             | 0                          |
| November 2010 | B2A12 | 0                           | 10                             | 0                          | 7                             | 0                                  | 0                            | 0                             | 0                          |
| November 2010 | B2A13 | 0                           | 3                              | 0                          | 1                             | 0                                  | 0                            | 0                             | 0                          |

| Date          | Plot  | <i>Megalothorax minimus</i> | <i>Mesaphorura macrochaeta</i> | <i>Metaphorura affinis</i> | <i>Stenaphorurella denisi</i> | <i>Paratullbergia macedougalli</i> | <i>Onychiurus jubilarius</i> | <i>Supraphorura furcifera</i> | <i>Protaphorura armata</i> |
|---------------|-------|-----------------------------|--------------------------------|----------------------------|-------------------------------|------------------------------------|------------------------------|-------------------------------|----------------------------|
| November 2010 | B2A14 | 0                           | 5                              | 0                          | 0                             | 0                                  | 0                            | 0                             | 0                          |
| November 2010 | B2A15 | 0                           | 14                             | 0                          | 0                             | 0                                  | 0                            | 0                             | 0                          |
| November 2010 | B2A16 | 3                           | 34                             | 0                          | 0                             | 0                                  | 0                            | 0                             | 0                          |
| November 2010 | B2A17 | 0                           | 3                              | 0                          | 0                             | 0                                  | 0                            | 0                             | 0                          |
| November 2010 | B2A18 | 2                           | 7                              | 0                          | 0                             | 0                                  | 0                            | 0                             | 0                          |
| November 2010 | B2A19 | 0                           | 0                              | 0                          | 2                             | 0                                  | 0                            | 0                             | 0                          |
| November 2010 | B2A20 | 0                           | 0                              | 0                          | 5                             | 0                                  | 2                            | 0                             | 0                          |
| November 2010 | B2A21 | 6                           | 15                             | 47                         | 18                            | 0                                  | 4                            | 0                             | 0                          |
| November 2010 | B2A22 | 0                           | 0                              | 0                          | 0                             | 0                                  | 0                            | 0                             | 0                          |
| November 2010 | B3A01 | 0                           | 0                              | 0                          | 5                             | 0                                  | 2                            | 0                             | 0                          |
| November 2010 | B3A02 | 0                           | 15                             | 0                          | 9                             | 0                                  | 5                            | 3                             | 0                          |
| November 2010 | B3A03 | 0                           | 1                              | 0                          | 0                             | 0                                  | 0                            | 0                             | 0                          |
| November 2010 | B3A04 | 4                           | 0                              | 0                          | 14                            | 0                                  | 0                            | 0                             | 0                          |
| November 2010 | B3A05 | 4                           | 5                              | 0                          | 0                             | 0                                  | 1                            | 0                             | 0                          |
| November 2010 | B3A06 | 1                           | 11                             | 0                          | 3                             | 0                                  | 0                            | 0                             | 0                          |
| November 2010 | B3A07 | 1                           | 0                              | 0                          | 1                             | 0                                  | 0                            | 0                             | 0                          |
| November 2010 | B3A08 | 1                           | 5                              | 0                          | 4                             | 0                                  | 0                            | 0                             | 0                          |
| November 2010 | B3A09 | 0                           | 0                              | 0                          | 1                             | 0                                  | 0                            | 0                             | 0                          |
| November 2010 | B3A11 | 9                           | 0                              | 0                          | 0                             | 0                                  | 1                            | 0                             | 0                          |
| November 2010 | B3A12 | 0                           | 0                              | 0                          | 10                            | 0                                  | 1                            | 0                             | 0                          |
| November 2010 | B3A13 | 1                           | 1                              | 0                          | 9                             | 0                                  | 0                            | 0                             | 0                          |
| November 2010 | B3A14 | 1                           | 2                              | 0                          | 0                             | 0                                  | 0                            | 0                             | 0                          |
| November 2010 | B3A16 | 4                           | 4                              | 0                          | 8                             | 0                                  | 0                            | 0                             | 0                          |
| November 2010 | B3A17 | 0                           | 1                              | 0                          | 0                             | 0                                  | 4                            | 0                             | 0                          |
| November 2010 | B3A19 | 2                           | 38                             | 0                          | 0                             | 0                                  | 0                            | 0                             | 0                          |
| November 2010 | B3A20 | 1                           | 4                              | 0                          | 5                             | 0                                  | 0                            | 0                             | 0                          |
| November 2010 | B3A21 | 0                           | 0                              | 0                          | 0                             | 0                                  | 0                            | 0                             | 0                          |
| November 2010 | B3A22 | 9                           | 0                              | 0                          | 3                             | 0                                  | 0                            | 0                             | 0                          |
| November 2010 | B3A23 | 1                           | 3                              | 0                          | 0                             | 0                                  | 1                            | 0                             | 0                          |
| November 2010 | B3A24 | 1                           | 0                              | 0                          | 2                             | 0                                  | 0                            | 0                             | 0                          |
| November 2010 | B4A01 | 15                          | 6                              | 0                          | 7                             | 0                                  | 1                            | 0                             | 0                          |
| November 2010 | B4A02 | 0                           | 0                              | 0                          | 4                             | 0                                  | 0                            | 0                             | 0                          |
| November 2010 | B4A04 | 3                           | 5                              | 0                          | 0                             | 0                                  | 0                            | 0                             | 0                          |
| November 2010 | B4A06 | 0                           | 4                              | 0                          | 2                             | 0                                  | 0                            | 0                             | 0                          |
| November 2010 | B4A07 | 0                           | 3                              | 0                          | 1                             | 0                                  | 6                            | 0                             | 0                          |
| November 2010 | B4A08 | 1                           | 11                             | 0                          | 2                             | 0                                  | 3                            | 0                             | 0                          |









| Date         | Plot  | <i>Megalothorax minimus</i> | <i>Mesaphorura macrochaeta</i> | <i>Metaphorura affinis</i> | <i>Stenaphorurella denisi</i> | <i>Paratullbergia macedougalli</i> | <i>Onychiurus jubilaris</i> | <i>Supraphorura furcifera</i> | <i>Protaphorura armata</i> |
|--------------|-------|-----------------------------|--------------------------------|----------------------------|-------------------------------|------------------------------------|-----------------------------|-------------------------------|----------------------------|
| October 2013 | B1A18 | 0                           | 1                              | 0                          | 0                             | 0                                  | 0                           | 0                             | 0                          |
| October 2013 | B1A19 | 0                           | 0                              | 0                          | 5                             | 0                                  | 0                           | 0                             | 0                          |
| October 2013 | B1A20 | 0                           | 0                              | 0                          | 57                            | 0                                  | 0                           | 0                             | 0                          |
| October 2013 | B1A21 | 0                           | 0                              | 0                          | 0                             | 0                                  | 0                           | 0                             | 0                          |
| October 2013 | B1A22 | 0                           | 0                              | 0                          | 48                            | 0                                  | 0                           | 0                             | 0                          |
| October 2013 | B2A01 | 0                           | 0                              | 0                          | 13                            | 0                                  | 0                           | 0                             | 0                          |
| October 2013 | B2A02 | 0                           | 0                              | 0                          | 7                             | 0                                  | 0                           | 0                             | 0                          |
| October 2013 | B2A03 | 0                           | 0                              | 0                          | 20                            | 0                                  | 0                           | 0                             | 0                          |
| October 2013 | B2A04 | 0                           | 0                              | 0                          | 0                             | 0                                  | 0                           | 0                             | 0                          |
| October 2013 | B2A05 | 0                           | 0                              | 0                          | 0                             | 0                                  | 0                           | 0                             | 0                          |
| October 2013 | B2A06 | 0                           | 0                              | 0                          | 0                             | 0                                  | 0                           | 0                             | 0                          |
| October 2013 | B2A08 | 0                           | 0                              | 0                          | 0                             | 0                                  | 0                           | 0                             | 0                          |
| October 2013 | B2A09 | 0                           | 0                              | 0                          | 59                            | 0                                  | 0                           | 0                             | 0                          |
| October 2013 | B2A10 | 0                           | 0                              | 0                          | 16                            | 0                                  | 0                           | 0                             | 0                          |
| October 2013 | B2A12 | 0                           | 0                              | 0                          | 11                            | 0                                  | 0                           | 0                             | 0                          |
| October 2013 | B2A13 | 0                           | 0                              | 0                          | 0                             | 0                                  | 0                           | 0                             | 0                          |
| October 2013 | B2A14 | 0                           | 0                              | 0                          | 13                            | 0                                  | 0                           | 0                             | 0                          |
| October 2013 | B2A15 | 0                           | 0                              | 0                          | 0                             | 0                                  | 0                           | 0                             | 0                          |
| October 2013 | B2A16 | 0                           | 0                              | 0                          | 10                            | 0                                  | 0                           | 0                             | 0                          |
| October 2013 | B2A17 | 0                           | 0                              | 0                          | 55                            | 0                                  | 0                           | 0                             | 0                          |
| October 2013 | B2A18 | 0                           | 0                              | 0                          | 55                            | 0                                  | 0                           | 0                             | 0                          |
| October 2013 | B2A19 | 0                           | 0                              | 0                          | 62                            | 0                                  | 0                           | 0                             | 0                          |
| October 2013 | B2A20 | 0                           | 0                              | 0                          | 1                             | 0                                  | 0                           | 0                             | 0                          |
| October 2013 | B2A21 | 0                           | 0                              | 0                          | 8                             | 0                                  | 0                           | 0                             | 0                          |
| October 2013 | B2A22 | 0                           | 0                              | 0                          | 14                            | 0                                  | 0                           | 0                             | 0                          |
| October 2013 | B3A01 | 0                           | 0                              | 0                          | 10                            | 0                                  | 0                           | 0                             | 0                          |
| October 2013 | B3A02 | 0                           | 0                              | 0                          | 0                             | 0                                  | 0                           | 0                             | 0                          |
| October 2013 | B3A03 | 0                           | 0                              | 0                          | 0                             | 0                                  | 0                           | 0                             | 0                          |
| October 2013 | B3A04 | 0                           | 0                              | 0                          | 6                             | 0                                  | 0                           | 0                             | 0                          |
| October 2013 | B3A05 | 0                           | 0                              | 0                          | 3                             | 0                                  | 0                           | 0                             | 0                          |
| October 2013 | B3A06 | 0                           | 0                              | 0                          | 8                             | 0                                  | 0                           | 0                             | 0                          |
| October 2013 | B3A07 | 0                           | 0                              | 0                          | 8                             | 0                                  | 0                           | 0                             | 0                          |
| October 2013 | B3A08 | 0                           | 0                              | 0                          | 5                             | 0                                  | 0                           | 0                             | 0                          |
| October 2013 | B3A09 | 0                           | 0                              | 0                          | 1                             | 0                                  | 0                           | 0                             | 0                          |
| October 2013 | B3A11 | 0                           | 0                              | 0                          | 8                             | 0                                  | 0                           | 0                             | 0                          |
| October 2013 | B3A12 | 0                           | 0                              | 0                          | 3                             | 0                                  | 0                           | 0                             | 0                          |

| Date         | Plot  | <i>Megalothorax minimus</i> | <i>Mesaphorura macrochaeta</i> | <i>Metaphorura affinis</i> | <i>Stenaphorurella denisi</i> | <i>Paratullbergia macedougalli</i> | <i>Onychiurus jubilarius</i> | <i>Supraphorura furcifera</i> | <i>Protaphorura armata</i> |
|--------------|-------|-----------------------------|--------------------------------|----------------------------|-------------------------------|------------------------------------|------------------------------|-------------------------------|----------------------------|
| October 2013 | B3A13 | 0                           | 0                              | 0                          | 0                             | 0                                  | 0                            | 0                             | 0                          |
| October 2013 | B3A14 | 0                           | 0                              | 0                          | 71                            | 0                                  | 0                            | 0                             | 0                          |
| October 2013 | B3A16 | 0                           | 0                              | 0                          | 110                           | 0                                  | 0                            | 0                             | 0                          |
| October 2013 | B3A17 | 0                           | 0                              | 0                          | 0                             | 0                                  | 0                            | 0                             | 0                          |
| October 2013 | B3A19 | 0                           | 0                              | 0                          | 0                             | 0                                  | 0                            | 0                             | 0                          |
| October 2013 | B3A20 | 0                           | 1                              | 0                          | 7                             | 0                                  | 0                            | 0                             | 0                          |
| October 2013 | B3A21 | 0                           | 1                              | 0                          | 1                             | 0                                  | 0                            | 0                             | 0                          |
| October 2013 | B3A22 | 0                           | 0                              | 0                          | 0                             | 0                                  | 0                            | 0                             | 0                          |
| October 2013 | B3A23 | 0                           | 0                              | 0                          | 0                             | 0                                  | 0                            | 0                             | 0                          |
| October 2013 | B3A24 | 0                           | 0                              | 0                          | 20                            | 0                                  | 0                            | 0                             | 0                          |
| October 2013 | B4A01 | 0                           | 0                              | 0                          | 22                            | 0                                  | 0                            | 0                             | 0                          |
| October 2013 | B4A02 | 0                           | 0                              | 0                          | 3                             | 0                                  | 0                            | 0                             | 0                          |
| October 2013 | B4A04 | 0                           | 0                              | 0                          | 11                            | 0                                  | 0                            | 0                             | 0                          |
| October 2013 | B4A06 | 0                           | 0                              | 0                          | 0                             | 0                                  | 0                            | 0                             | 0                          |
| October 2013 | B4A07 | 0                           | 0                              | 0                          | 16                            | 0                                  | 0                            | 0                             | 0                          |
| October 2013 | B4A08 | 0                           | 0                              | 0                          | 5                             | 0                                  | 0                            | 0                             | 0                          |
| October 2013 | B4A09 | 0                           | 4                              | 0                          | 0                             | 0                                  | 0                            | 0                             | 0                          |
| October 2013 | B4A10 | 0                           | 0                              | 0                          | 10                            | 0                                  | 0                            | 0                             | 0                          |
| October 2013 | B4A11 | 0                           | 0                              | 0                          | 6                             | 0                                  | 0                            | 0                             | 0                          |
| October 2013 | B4A12 | 0                           | 0                              | 0                          | 2                             | 0                                  | 0                            | 0                             | 0                          |
| October 2013 | B4A13 | 0                           | 0                              | 0                          | 16                            | 0                                  | 0                            | 0                             | 0                          |
| October 2013 | B4A14 | 0                           | 0                              | 0                          | 36                            | 0                                  | 0                            | 0                             | 0                          |
| October 2013 | B4A15 | 0                           | 0                              | 0                          | 0                             | 0                                  | 0                            | 0                             | 0                          |
| October 2013 | B4A16 | 0                           | 0                              | 0                          | 0                             | 0                                  | 0                            | 0                             | 0                          |
| October 2013 | B4A17 | 0                           | 0                              | 0                          | 0                             | 0                                  | 0                            | 0                             | 0                          |
| October 2013 | B4A18 | 0                           | 0                              | 0                          | 4                             | 0                                  | 0                            | 0                             | 0                          |
| October 2013 | B4A20 | 0                           | 0                              | 0                          | 27                            | 0                                  | 0                            | 0                             | 0                          |
| October 2013 | B4A21 | 0                           | 0                              | 0                          | 28                            | 0                                  | 0                            | 0                             | 0                          |
| October 2013 | B4A22 | 0                           | 0                              | 0                          | 18                            | 0                                  | 0                            | 0                             | 0                          |

**Dataset**

Collembola species

Type raw  
Unit

| Date          | Plot  | <i>Sphaeridia pumilis</i> | <i>Sminthurinus aureus</i> | <i>Sminthurinus elegans</i> | <i>Sminthurinus niger</i> | <i>Sminthurus viridis</i> |
|---------------|-------|---------------------------|----------------------------|-----------------------------|---------------------------|---------------------------|
| November 2010 | B1A01 | 0                         | 0                          | 0                           | 0                         | 0                         |
| November 2010 | B1A02 | 0                         | 0                          | 0                           | 0                         | 0                         |
| November 2010 | B1A03 | 1                         | 0                          | 0                           | 0                         | 0                         |
| November 2010 | B1A04 | 0                         | 0                          | 0                           | 0                         | 0                         |
| November 2010 | B1A05 | 0                         | 0                          | 0                           | 0                         | 0                         |
| November 2010 | B1A06 | 0                         | 0                          | 0                           | 1                         | 0                         |
| November 2010 | B1A07 | 0                         | 0                          | 0                           | 0                         | 0                         |
| November 2010 | B1A08 | 0                         | 0                          | 0                           | 4                         | 0                         |
| November 2010 | B1A11 | 0                         | 0                          | 0                           | 1                         | 0                         |
| November 2010 | B1A12 | 0                         | 0                          | 0                           | 0                         | 0                         |
| November 2010 | B1A13 | 0                         | 0                          | 0                           | 5                         | 0                         |
| November 2010 | B1A14 | 0                         | 1                          | 0                           | 0                         | 0                         |
| November 2010 | B1A15 | 0                         | 0                          | 0                           | 0                         | 0                         |
| November 2010 | B1A16 | 0                         | 0                          | 0                           | 0                         | 0                         |
| November 2010 | B1A17 | 0                         | 0                          | 0                           | 0                         | 0                         |
| November 2010 | B1A18 | 0                         | 0                          | 0                           | 0                         | 0                         |
| November 2010 | B1A19 | 0                         | 0                          | 0                           | 3                         | 0                         |
| November 2010 | B1A20 | 0                         | 0                          | 0                           | 0                         | 0                         |
| November 2010 | B1A21 | 0                         | 1                          | 0                           | 0                         | 0                         |
| November 2010 | B1A22 | 0                         | 0                          | 0                           | 4                         | 0                         |
| November 2010 | B2A01 | 0                         | 0                          | 0                           | 2                         | 0                         |
| November 2010 | B2A02 | 0                         | 0                          | 0                           | 0                         | 0                         |
| November 2010 | B2A03 | 0                         | 0                          | 0                           | 0                         | 0                         |
| November 2010 | B2A04 | 0                         | 0                          | 0                           | 0                         | 0                         |
| November 2010 | B2A05 | 0                         | 0                          | 0                           | 1                         | 0                         |
| November 2010 | B2A06 | 0                         | 0                          | 0                           | 2                         | 0                         |
| November 2010 | B2A08 | 0                         | 0                          | 0                           | 0                         | 0                         |
| November 2010 | B2A09 | 0                         | 0                          | 0                           | 0                         | 0                         |
| November 2010 | B2A10 | 0                         | 0                          | 0                           | 0                         | 0                         |
| November 2010 | B2A12 | 0                         | 0                          | 0                           | 0                         | 0                         |
| November 2010 | B2A13 | 0                         | 0                          | 0                           | 0                         | 0                         |

| Date          | Plot  | <i>Sphaeridia pumilis</i> | <i>Sminthurinus aureus</i> | <i>Sminthurinus elegans</i> | <i>Sminthurinus niger</i> | <i>Sminthurus viridis</i> |
|---------------|-------|---------------------------|----------------------------|-----------------------------|---------------------------|---------------------------|
| November 2010 | B2A14 | 0                         | 0                          | 0                           | 0                         | 0                         |
| November 2010 | B2A15 | 0                         | 0                          | 0                           | 0                         | 0                         |
| November 2010 | B2A16 | 0                         | 0                          | 0                           | 0                         | 0                         |
| November 2010 | B2A17 | 0                         | 0                          | 0                           | 0                         | 0                         |
| November 2010 | B2A18 | 0                         | 0                          | 0                           | 0                         | 0                         |
| November 2010 | B2A19 | 0                         | 0                          | 0                           | 0                         | 0                         |
| November 2010 | B2A20 | 0                         | 0                          | 0                           | 1                         | 0                         |
| November 2010 | B2A21 | 0                         | 0                          | 0                           | 2                         | 0                         |
| November 2010 | B2A22 | 0                         | 0                          | 0                           | 0                         | 0                         |
| November 2010 | B3A01 | 0                         | 0                          | 0                           | 0                         | 0                         |
| November 2010 | B3A02 | 0                         | 0                          | 0                           | 0                         | 0                         |
| November 2010 | B3A03 | 0                         | 0                          | 1                           | 0                         | 0                         |
| November 2010 | B3A04 | 0                         | 0                          | 0                           | 2                         | 0                         |
| November 2010 | B3A05 | 0                         | 0                          | 0                           | 2                         | 0                         |
| November 2010 | B3A06 | 0                         | 0                          | 0                           | 2                         | 0                         |
| November 2010 | B3A07 | 0                         | 0                          | 0                           | 0                         | 0                         |
| November 2010 | B3A08 | 0                         | 0                          | 0                           | 0                         | 0                         |
| November 2010 | B3A09 | 0                         | 0                          | 0                           | 0                         | 0                         |
| November 2010 | B3A11 | 0                         | 5                          | 0                           | 0                         | 0                         |
| November 2010 | B3A12 | 0                         | 0                          | 0                           | 0                         | 0                         |
| November 2010 | B3A13 | 0                         | 0                          | 0                           | 1                         | 0                         |
| November 2010 | B3A14 | 0                         | 0                          | 0                           | 2                         | 0                         |
| November 2010 | B3A16 | 0                         | 0                          | 0                           | 1                         | 0                         |
| November 2010 | B3A17 | 0                         | 0                          | 0                           | 0                         | 0                         |
| November 2010 | B3A19 | 0                         | 0                          | 0                           | 0                         | 0                         |
| November 2010 | B3A20 | 0                         | 0                          | 0                           | 1                         | 0                         |
| November 2010 | B3A21 | 0                         | 0                          | 0                           | 0                         | 0                         |
| November 2010 | B3A22 | 0                         | 0                          | 0                           | 3                         | 0                         |
| November 2010 | B3A23 | 0                         | 0                          | 0                           | 3                         | 0                         |
| November 2010 | B3A24 | 0                         | 0                          | 0                           | 0                         | 0                         |
| November 2010 | B4A01 | 0                         | 0                          | 0                           | 1                         | 0                         |
| November 2010 | B4A02 | 0                         | 0                          | 0                           | 0                         | 0                         |
| November 2010 | B4A04 | 0                         | 0                          | 0                           | 1                         | 0                         |
| November 2010 | B4A06 | 0                         | 0                          | 0                           | 0                         | 0                         |
| November 2010 | B4A07 | 0                         | 0                          | 0                           | 0                         | 0                         |
| November 2010 | B4A08 | 0                         | 0                          | 0                           | 0                         | 0                         |

| Date          | Plot  | <i>Sphaeridia pumilis</i> | <i>Sminthurinus aureus</i> | <i>Sminthurinus elegans</i> | <i>Sminthurinus niger</i> | <i>Sminthurus viridis</i> |
|---------------|-------|---------------------------|----------------------------|-----------------------------|---------------------------|---------------------------|
| November 2010 | B4A09 | 0                         | 0                          | 0                           | 0                         | 0                         |
| November 2010 | B4A10 | 0                         | 0                          | 0                           | 0                         | 0                         |
| November 2010 | B4A11 | 0                         | 0                          | 0                           | 0                         | 0                         |
| November 2010 | B4A12 | 0                         | 0                          | 0                           | 0                         | 0                         |
| November 2010 | B4A13 | 0                         | 0                          | 0                           | 0                         | 0                         |
| November 2010 | B4A14 | 0                         | 0                          | 0                           | 0                         | 0                         |
| November 2010 | B4A15 | 0                         | 0                          | 0                           | 0                         | 0                         |
| November 2010 | B4A16 | 0                         | 0                          | 0                           | 0                         | 0                         |
| November 2010 | B4A17 | 0                         | 0                          | 0                           | 0                         | 0                         |
| November 2010 | B4A18 | 0                         | 0                          | 0                           | 0                         | 0                         |
| November 2010 | B4A20 | 0                         | 0                          | 0                           | 0                         | 0                         |
| November 2010 | B4A21 | 0                         | 0                          | 0                           | 0                         | 0                         |
| November 2010 | B4A22 | 0                         | 0                          | 0                           | 0                         | 0                         |
| July 2013     | B1A01 | 0                         | 0                          | 0                           | 0                         | 0                         |
| July 2013     | B1A02 | 0                         | 0                          | 0                           | 0                         | 0                         |
| July 2013     | B1A03 | 0                         | 0                          | 0                           | 0                         | 0                         |
| July 2013     | B1A04 | 0                         | 0                          | 0                           | 0                         | 0                         |
| July 2013     | B1A05 | 0                         | 0                          | 0                           | 0                         | 0                         |
| July 2013     | B1A06 | 0                         | 0                          | 0                           | 0                         | 0                         |
| July 2013     | B1A07 | 0                         | 0                          | 0                           | 0                         | 0                         |
| July 2013     | B1A08 | 0                         | 0                          | 0                           | 0                         | 0                         |
| July 2013     | B1A11 | 0                         | 0                          | 0                           | 0                         | 0                         |
| July 2013     | B1A12 | 0                         | 0                          | 0                           | 0                         | 0                         |
| July 2013     | B1A13 | 0                         | 0                          | 0                           | 0                         | 0                         |
| July 2013     | B1A14 | 1                         | 0                          | 0                           | 0                         | 0                         |
| July 2013     | B1A15 | 0                         | 0                          | 0                           | 0                         | 0                         |
| July 2013     | B1A16 | 0                         | 0                          | 0                           | 0                         | 0                         |
| July 2013     | B1A17 | 0                         | 0                          | 0                           | 0                         | 0                         |
| July 2013     | B1A18 | 0                         | 0                          | 0                           | 0                         | 0                         |
| July 2013     | B1A19 | 0                         | 0                          | 0                           | 0                         | 0                         |
| July 2013     | B1A20 | 0                         | 0                          | 0                           | 0                         | 0                         |
| July 2013     | B1A21 | 0                         | 0                          | 0                           | 0                         | 0                         |
| July 2013     | B1A22 | 0                         | 0                          | 0                           | 0                         | 0                         |
| July 2013     | B2A01 | 0                         | 0                          | 0                           | 0                         | 0                         |
| July 2013     | B2A02 | 0                         | 0                          | 0                           | 0                         | 0                         |
| July 2013     | B2A03 | 0                         | 0                          | 0                           | 0                         | 0                         |

| Date      | Plot  | <i>Sphaeridia pumilis</i> | <i>Sminthurinus aureus</i> | <i>Sminthurinus elegans</i> | <i>Sminthurinus niger</i> | <i>Sminthurus viridis</i> |
|-----------|-------|---------------------------|----------------------------|-----------------------------|---------------------------|---------------------------|
| July 2013 | B2A04 | 0                         | 0                          | 0                           | 0                         | 0                         |
| July 2013 | B2A05 | 0                         | 0                          | 0                           | 0                         | 0                         |
| July 2013 | B2A06 | 0                         | 0                          | 0                           | <b>0</b>                  | 0                         |
| July 2013 | B2A08 | 0                         | 0                          | 0                           | 0                         | 0                         |
| July 2013 | B2A09 | 0                         | 0                          | 0                           | 0                         | 0                         |
| July 2013 | B2A10 | 0                         | 0                          | 0                           | 0                         | 0                         |
| July 2013 | B2A12 | 0                         | 0                          | 0                           | <b>0</b>                  | 0                         |
| July 2013 | B2A13 | 0                         | 0                          | 0                           | <b>0</b>                  | 0                         |
| July 2013 | B2A14 | 0                         | 0                          | 0                           | <b>0</b>                  | 0                         |
| July 2013 | B2A15 | 0                         | 0                          | 0                           | 0                         | 0                         |
| July 2013 | B2A16 | 0                         | 0                          | 0                           | <b>0</b>                  | 0                         |
| July 2013 | B2A17 | 0                         | 0                          | 0                           | <b>1</b>                  | 0                         |
| July 2013 | B2A18 | 0                         | 0                          | 0                           | 0                         | 0                         |
| July 2013 | B2A19 | 0                         | 0                          | 0                           | 0                         | 0                         |
| July 2013 | B2A20 | 0                         | 0                          | 0                           | 0                         | 0                         |
| July 2013 | B2A21 | 0                         | 0                          | 0                           | 0                         | 0                         |
| July 2013 | B2A22 | 0                         | 0                          | 0                           | 0                         | 0                         |
| July 2013 | B3A01 | 0                         | 0                          | 0                           | 0                         | 0                         |
| July 2013 | B3A02 | 0                         | 0                          | 0                           | 0                         | 0                         |
| July 2013 | B3A03 | 0                         | 0                          | 0                           | 0                         | 0                         |
| July 2013 | B3A04 | 0                         | 0                          | 0                           | 0                         | 0                         |
| July 2013 | B3A05 | 0                         | 0                          | 0                           | 0                         | 0                         |
| July 2013 | B3A06 | 0                         | 0                          | 0                           | 0                         | 0                         |
| July 2013 | B3A07 | 0                         | 0                          | 0                           | 0                         | 0                         |
| July 2013 | B3A08 | 0                         | 0                          | 0                           | 0                         | 0                         |
| July 2013 | B3A09 | 0                         | 0                          | 0                           | 0                         | 0                         |
| July 2013 | B3A11 | 0                         | 0                          | 0                           | <b>0</b>                  | 0                         |
| July 2013 | B3A12 | 0                         | 0                          | 0                           | 0                         | 0                         |
| July 2013 | B3A13 | 0                         | 0                          | 0                           | 0                         | 0                         |
| July 2013 | B3A14 | 0                         | 0                          | 0                           | 0                         | 0                         |
| July 2013 | B3A16 | 0                         | 0                          | 0                           | 0                         | 0                         |
| July 2013 | B3A17 | 0                         | 0                          | 0                           | 0                         | 0                         |
| July 2013 | B3A19 | 0                         | 0                          | 0                           | 0                         | 0                         |
| July 2013 | B3A20 | 0                         | 0                          | 0                           | 0                         | 0                         |
| July 2013 | B3A21 | 0                         | 0                          | 0                           | 0                         | 0                         |
| July 2013 | B3A22 | 0                         | 0                          | 0                           | 0                         | 1                         |



| Date         | Plot  | <i>Sphaeridia pumilis</i> | <i>Sminthurinus aureus</i> | <i>Sminthurinus elegans</i> | <i>Sminthurinus niger</i> | <i>Sminthurus viridis</i> |
|--------------|-------|---------------------------|----------------------------|-----------------------------|---------------------------|---------------------------|
| July 2013    | B3A23 | 0                         | 0                          | 0                           | 0                         | 0                         |
| July 2013    | B3A24 | 0                         | 0                          | 0                           | 0                         | 0                         |
| July 2013    | B4A01 | 0                         | 0                          | 0                           | 0                         | 0                         |
| July 2013    | B4A02 | 0                         | 0                          | 0                           | 0                         | 0                         |
| July 2013    | B4A04 | 0                         | 0                          | 0                           | 0                         | 0                         |
| July 2013    | B4A06 | 0                         | 0                          | 0                           | 0                         | 0                         |
| July 2013    | B4A07 | 0                         | 0                          | 0                           | 0                         | 0                         |
| July 2013    | B4A08 | 0                         | 0                          | 0                           | 0                         | 0                         |
| July 2013    | B4A09 | 0                         | 0                          | 0                           | 0                         | 0                         |
| July 2013    | B4A10 | 0                         | 0                          | 0                           | 0                         | 0                         |
| July 2013    | B4A11 | 0                         | 0                          | 0                           | 0                         | 0                         |
| July 2013    | B4A12 | 0                         | 0                          | 0                           | 0                         | 0                         |
| July 2013    | B4A13 | 0                         | 0                          | 0                           | 0                         | 0                         |
| July 2013    | B4A14 | 1                         | 0                          | 0                           | 0                         | 0                         |
| July 2013    | B4A15 | 0                         | 0                          | 0                           | 0                         | 0                         |
| July 2013    | B4A16 | 0                         | 0                          | 0                           | 0                         | 0                         |
| July 2013    | B4A17 | 0                         | 0                          | 0                           | 0                         | 0                         |
| July 2013    | B4A18 | 0                         | 0                          | 0                           | 0                         | 0                         |
| July 2013    | B4A20 | 0                         | 0                          | 0                           | 0                         | 0                         |
| July 2013    | B4A21 | 0                         | 0                          | 0                           | 0                         | 0                         |
| July 2013    | B4A22 | 0                         | 0                          | 0                           | 0                         | 0                         |
| October 2013 | B1A01 | 0                         | 0                          | 0                           | 0                         | 0                         |
| October 2013 | B1A02 | 0                         | 0                          | 0                           | 0                         | 0                         |
| October 2013 | B1A03 | 0                         | 0                          | 0                           | 0                         | 0                         |
| October 2013 | B1A04 | 0                         | 0                          | 0                           | 0                         | 0                         |
| October 2013 | B1A05 | 0                         | 0                          | 0                           | 0                         | 0                         |
| October 2013 | B1A06 | 0                         | 12                         | 0                           | 0                         | 0                         |
| October 2013 | B1A07 | 0                         | 0                          | 0                           | 0                         | 0                         |
| October 2013 | B1A08 | 0                         | 0                          | 0                           | 0                         | 0                         |
| October 2013 | B1A11 | 0                         | 0                          | 0                           | 0                         | 0                         |
| October 2013 | B1A12 | 0                         | 0                          | 0                           | 0                         | 0                         |
| October 2013 | B1A13 | 0                         | 0                          | 0                           | 0                         | 0                         |
| October 2013 | B1A14 | 0                         | 0                          | 0                           | 0                         | 0                         |
| October 2013 | B1A15 | 0                         | 0                          | 0                           | 0                         | 0                         |
| October 2013 | B1A16 | 0                         | 0                          | 0                           | 0                         | 0                         |
| October 2013 | B1A17 | 0                         | 0                          | 0                           | 0                         | 0                         |

| Date         | Plot  | <i>Sphaeridia pumilis</i> | <i>Sminthurinus aureus</i> | <i>Sminthurinus elegans</i> | <i>Sminthurinus niger</i> | <i>Sminthurus viridis</i> |
|--------------|-------|---------------------------|----------------------------|-----------------------------|---------------------------|---------------------------|
| October 2013 | B1A18 | 0                         | 0                          | 0                           | 0                         | 0                         |
| October 2013 | B1A19 | 0                         | 0                          | 0                           | 0                         | 0                         |
| October 2013 | B1A20 | 0                         | 0                          | 0                           | 0                         | 0                         |
| October 2013 | B1A21 | 0                         | 0                          | 0                           | 0                         | 0                         |
| October 2013 | B1A22 | 0                         | 0                          | 0                           | 0                         | 0                         |
| October 2013 | B2A01 | 0                         | 1                          | 0                           | 0                         | 0                         |
| October 2013 | B2A02 | 0                         | 0                          | 0                           | 0                         | 0                         |
| October 2013 | B2A03 | 0                         | 0                          | 0                           | 0                         | 0                         |
| October 2013 | B2A04 | 0                         | 1                          | 0                           | 0                         | 0                         |
| October 2013 | B2A05 | 0                         | 0                          | 0                           | 0                         | 0                         |
| October 2013 | B2A06 | 0                         | 0                          | 0                           | 0                         | 0                         |
| October 2013 | B2A08 | 0                         | 0                          | 0                           | 0                         | 0                         |
| October 2013 | B2A09 | 0                         | 0                          | 0                           | 0                         | 0                         |
| October 2013 | B2A10 | 0                         | 0                          | 0                           | 0                         | 0                         |
| October 2013 | B2A12 | 0                         | 0                          | 0                           | 0                         | 0                         |
| October 2013 | B2A13 | 0                         | 0                          | 0                           | 0                         | 0                         |
| October 2013 | B2A14 | 0                         | 1                          | 0                           | 0                         | 0                         |
| October 2013 | B2A15 | 0                         | 0                          | 0                           | 0                         | 0                         |
| October 2013 | B2A16 | 0                         | 0                          | 0                           | 0                         | 0                         |
| October 2013 | B2A17 | 0                         | 0                          | 0                           | 0                         | 0                         |
| October 2013 | B2A18 | 0                         | 0                          | 0                           | 0                         | 0                         |
| October 2013 | B2A19 | 0                         | 0                          | 0                           | 0                         | 0                         |
| October 2013 | B2A20 | 0                         | 0                          | 0                           | 0                         | 0                         |
| October 2013 | B2A21 | 0                         | 1                          | 0                           | 0                         | 0                         |
| October 2013 | B2A22 | 0                         | 0                          | 0                           | 0                         | 0                         |
| October 2013 | B3A01 | 0                         | 0                          | 0                           | 0                         | 0                         |
| October 2013 | B3A02 | 0                         | 0                          | 0                           | 0                         | 0                         |
| October 2013 | B3A03 | 0                         | 0                          | 0                           | 0                         | 0                         |
| October 2013 | B3A04 | 0                         | 0                          | 0                           | 0                         | 0                         |
| October 2013 | B3A05 | 0                         | 0                          | 0                           | 0                         | 0                         |
| October 2013 | B3A06 | 0                         | 0                          | 0                           | 0                         | 0                         |
| October 2013 | B3A07 | 0                         | 0                          | 0                           | 0                         | 0                         |
| October 2013 | B3A08 | 0                         | 0                          | 0                           | 0                         | 0                         |
| October 2013 | B3A09 | 0                         | 0                          | 0                           | 0                         | 0                         |
| October 2013 | B3A11 | 0                         | 0                          | 0                           | 0                         | 0                         |
| October 2013 | B3A12 | 0                         | 0                          | 0                           | 0                         | 0                         |

| Date         | Plot  | <i>Sphaeridia pumilis</i> | <i>Sminthurinus aureus</i> | <i>Sminthurinus elegans</i> | <i>Sminthurinus niger</i> | <i>Sminthurus viridis</i> |
|--------------|-------|---------------------------|----------------------------|-----------------------------|---------------------------|---------------------------|
| October 2013 | B3A13 | 0                         | 0                          | 0                           | 0                         | 0                         |
| October 2013 | B3A14 | 0                         | 0                          | 0                           | 0                         | 0                         |
| October 2013 | B3A16 | 0                         | 0                          | 0                           | 0                         | 0                         |
| October 2013 | B3A17 | 0                         | 0                          | 0                           | 0                         | 0                         |
| October 2013 | B3A19 | 0                         | 0                          | 0                           | 0                         | 0                         |
| October 2013 | B3A20 | 0                         | 0                          | 0                           | 0                         | 0                         |
| October 2013 | B3A21 | 0                         | 0                          | 0                           | 0                         | 0                         |
| October 2013 | B3A22 | 0                         | 0                          | 0                           | 0                         | 0                         |
| October 2013 | B3A23 | 0                         | 1                          | 0                           | 0                         | 0                         |
| October 2013 | B3A24 | 0                         | 0                          | 0                           | 0                         | 0                         |
| October 2013 | B4A01 | 0                         | 0                          | 0                           | 0                         | 0                         |
| October 2013 | B4A02 | 0                         | 0                          | 0                           | 0                         | 0                         |
| October 2013 | B4A04 | 0                         | 0                          | 0                           | 0                         | 0                         |
| October 2013 | B4A06 | 0                         | 0                          | 0                           | 0                         | 0                         |
| October 2013 | B4A07 | 0                         | 0                          | 0                           | 0                         | 0                         |
| October 2013 | B4A08 | 0                         | 0                          | 0                           | 0                         | 0                         |
| October 2013 | B4A09 | 0                         | 1                          | 0                           | 0                         | 0                         |
| October 2013 | B4A10 | 0                         | 0                          | 0                           | 0                         | 0                         |
| October 2013 | B4A11 | 0                         | 0                          | 0                           | 0                         | 0                         |
| October 2013 | B4A12 | 0                         | 0                          | 0                           | 0                         | 0                         |
| October 2013 | B4A13 | 0                         | 0                          | 0                           | 0                         | 0                         |
| October 2013 | B4A14 | 0                         | 0                          | 0                           | 0                         | 0                         |
| October 2013 | B4A15 | 0                         | 0                          | 0                           | 0                         | 0                         |
| October 2013 | B4A16 | 0                         | 0                          | 0                           | 0                         | 0                         |
| October 2013 | B4A17 | 0                         | 0                          | 0                           | 0                         | 0                         |
| October 2013 | B4A18 | 0                         | 0                          | 0                           | 0                         | 0                         |
| October 2013 | B4A20 | 0                         | 0                          | 0                           | 0                         | 0                         |
| October 2013 | B4A21 | 0                         | 0                          | 0                           | 0                         | 0                         |
| October 2013 | B4A22 | 0                         | 0                          | 0                           | 0                         | 0                         |
