# Supplementary material for: Response of Collembola and Acari communities to summer flooding in a grassland plant diversity experiment
Source: PubMed Central journal article supplement (PMC6117009; doi:10.1371/journal.pone.0202862), 2018-08-30
Supplement: pone.0202862.s005.pdf [file pone.0202862.s005.pdf]

**Dataset**

Oribatida species

Type raw

Unit individuals in soil cores of 5 cm diameter and 5 cm depth

| Date          | Plot  | <i>Liebstadia similis</i> | <i>Oppiella nova</i> | <i>Punctoribates punctum</i> | <i>Rhysotritia ardua ardua</i> | <i>Scheloribates laevigatus</i> | <i>Tectocepheus velatus velatus</i> | <i>Tectocepheus velatus sarekensis</i> | <i>Oribatula excavata</i> | <i>Nothrus anauniensis</i> | <i>Nothrus pratensis</i> |
|---------------|-------|---------------------------|----------------------|------------------------------|--------------------------------|---------------------------------|-------------------------------------|----------------------------------------|---------------------------|----------------------------|--------------------------|
| November 2010 | B1A01 | 0                         | 8                    | 0                            | 0                              | 0                               | 0                                   | 5                                      | 1                         | 0                          | 0                        |
| November 2010 | B1A02 | 0                         | 0                    | 0                            | 0                              | 0                               | 0                                   | 1                                      | 0                         | 0                          | 0                        |
| November 2010 | B1A03 | 21                        | 31                   | 0                            | 0                              | 0                               | 0                                   | 1                                      | 0                         | 0                          | 0                        |
| November 2010 | B1A04 | 0                         | 5                    | 0                            | 0                              | 0                               | 1                                   | 1                                      | 245                       | 0                          | 0                        |
| November 2010 | B1A05 | 0                         | 3                    | 0                            | 1                              | 0                               | 0                                   | 0                                      | 0                         | 0                          | 0                        |
| November 2010 | B1A06 | 0                         | 11                   | 0                            | 2                              | 0                               | 0                                   | 0                                      | 0                         | 0                          | 0                        |
| November 2010 | B1A07 | 0                         | 0                    | 0                            | 2                              | 0                               | 0                                   | 0                                      | 0                         | 0                          | 0                        |
| November 2010 | B1A08 | 0                         | 0                    | 0                            | 0                              | 0                               | 0                                   | 0                                      | 0                         | 0                          | 0                        |
| November 2010 | B1A11 | 0                         | 31                   | 0                            | 2                              | 0                               | 0                                   | 8                                      | 0                         | 1                          | 3                        |
| November 2010 | B1A12 | 0                         | 0                    | 0                            | 2                              | 0                               | 0                                   | 0                                      | 0                         | 0                          | 0                        |
| November 2010 | B1A14 | 0                         | 0                    | 1                            | 0                              | 8                               | 0                                   | 4                                      | 0                         | 0                          | 0                        |
| November 2010 | B1A16 | 0                         | 4                    | 0                            | 5                              | 0                               | 0                                   | 1                                      | 0                         | 0                          | 0                        |
| November 2010 | B1A17 | 0                         | 0                    | 0                            | 0                              | 0                               | 0                                   | 0                                      | 0                         | 0                          | 0                        |
| November 2010 | B1A19 | 0                         | 4                    | 0                            | 0                              | 0                               | 0                                   | 1                                      | 0                         | 0                          | 0                        |
| November 2010 | B1A20 | 0                         | 0                    | 0                            | 1                              | 0                               | 0                                   | 1                                      | 0                         | 1                          | 0                        |
| November 2010 | B1A21 | 0                         | 1                    | 0                            | 0                              | 0                               | 0                                   | 0                                      | 0                         | 0                          | 0                        |
| November 2010 | B1A22 | 0                         | 0                    | 0                            | 3                              | 0                               | 0                                   | 3                                      | 0                         | 0                          | 0                        |
| November 2010 | B2A01 | 0                         | 0                    | 0                            | 0                              | 0                               | 0                                   | 1                                      | 0                         | 0                          | 0                        |
| November 2010 | B2A03 | 0                         | 1                    | 0                            | 0                              | 0                               | 0                                   | 0                                      | 0                         | 0                          | 0                        |
| November 2010 | B2A04 | 0                         | 0                    | 0                            | 0                              | 0                               | 0                                   | 0                                      | 0                         | 0                          | 0                        |
| November 2010 | B2A05 | 0                         | 7                    | 0                            | 0                              | 0                               | 0                                   | 0                                      | 0                         | 0                          | 0                        |
| November 2010 | B2A06 | 0                         | 3                    | 14                           | 0                              | 0                               | 0                                   | 0                                      | 0                         | 0                          | 0                        |
| November 2010 | B2A08 | 0                         | 8                    | 0                            | 4                              | 0                               | 0                                   | 1                                      | 0                         | 0                          | 0                        |
| November 2010 | B2A09 | 0                         | 1                    | 1                            | 10                             | 0                               | 0                                   | 1                                      | 0                         | 0                          | 0                        |
| November 2010 | B2A10 | 0                         | 1                    | 3                            | 0                              | 0                               | 0                                   | 1                                      | 0                         | 0                          | 0                        |
| November 2010 | B2A12 | 0                         | 0                    | 0                            | 0                              | 1                               | 0                                   | 0                                      | 0                         | 0                          | 0                        |
| November 2010 | B2A13 | 0                         | 0                    | 0                            | 0                              | 0                               | 0                                   | 0                                      | 0                         | 0                          | 0                        |
| November 2010 | B2A14 | 0                         | 11                   | 0                            | 3                              | 0                               | 0                                   | 2                                      | 0                         | 0                          | 0                        |
| November 2010 | B2A15 | 0                         | 0                    | 0                            | 0                              | 0                               | 0                                   | 0                                      | 0                         | 0                          | 0                        |
| November 2010 | B2A16 | 0                         | 0                    | 0                            | 0                              | 0                               | 0                                   | 0                                      | 0                         | 0                          | 0                        |
| November 2010 | B2A17 | 0                         | 2                    | 0                            | 0                              | 0                               | 0                                   | 0                                      | 0                         | 0                          | 0                        |
| November 2010 | B2A18 | 0                         | 0                    | 0                            | 0                              | 0                               | 0                                   | 3                                      | 0                         | 0                          | 0                        |
| November 2010 | B2A19 | 0                         | 3                    | 0                            | 0                              | 0                               | 0                                   | 1                                      | 0                         | 0                          | 0                        |







| Date         | Plot  | <i>Liebstadia similis</i> | <i>Oppiella nova</i> | <i>Punctoribates punctum</i> | <i>Rhysotritia ardua ardua</i> | <i>Scheloribates laevigatus</i> | <i>Tectocepheus velatus velatus</i> | <i>Tectocepheus velatus sarekensis</i> | <i>Oribatula excavata</i> | <i>Nothrus anauniensis</i> | <i>Nothrus pratensis</i> |
|--------------|-------|---------------------------|----------------------|------------------------------|--------------------------------|---------------------------------|-------------------------------------|----------------------------------------|---------------------------|----------------------------|--------------------------|
| July 2013    | B3A16 | 0                         | 0                    | 0                            | 0                              | 0                               | 0                                   | 0                                      | 0                         | 0                          | 0                        |
| July 2013    | B3A17 | 0                         | 0                    | 0                            | 0                              | 0                               | 0                                   | 0                                      | 0                         | 0                          | 0                        |
| July 2013    | B3A19 | 0                         | 0                    | 0                            | 0                              | 0                               | 0                                   | 0                                      | 0                         | 0                          | 0                        |
| July 2013    | B3A20 | 0                         | 0                    | 0                            | 0                              | 0                               | 0                                   | 0                                      | 0                         | 0                          | 0                        |
| July 2013    | B3A21 | 0                         | 0                    | 0                            | 0                              | 1                               | 0                                   | 1                                      | 0                         | 0                          | 0                        |
| July 2013    | B3A22 | 0                         | 0                    | 0                            | 0                              | 0                               | 0                                   | 0                                      | 0                         | 0                          | 0                        |
| July 2013    | B3A23 | 0                         | 0                    | 0                            | 0                              | 0                               | 0                                   | 0                                      | 0                         | 0                          | 0                        |
| July 2013    | B3A24 | 0                         | 0                    | 0                            | 0                              | 0                               | 0                                   | 0                                      | 0                         | 0                          | 0                        |
| October 2013 | B1A01 | 0                         | 11                   | 0                            | 4                              | 0                               | 0                                   | 0                                      | 1                         | 0                          | 0                        |
| October 2013 | B1A02 | 0                         | 0                    | 0                            | 0                              | 7                               | 0                                   | 5                                      | 0                         | 0                          | 0                        |
| October 2013 | B1A03 | 0                         | 4                    | 0                            | 3                              | 2                               | 0                                   | 1                                      | 0                         | 0                          | 0                        |
| October 2013 | B1A04 | 0                         | 3                    | 0                            | 2                              | 0                               | 0                                   | 2                                      | 0                         | 0                          | 0                        |
| October 2013 | B1A05 | 0                         | 0                    | 0                            | 0                              | 0                               | 0                                   | 0                                      | 0                         | 0                          | 0                        |
| October 2013 | B1A06 | 0                         | 53                   | 0                            | 0                              | 0                               | 0                                   | 1                                      | 0                         | 0                          | 0                        |
| October 2013 | B1A07 | 0                         | 19                   | 0                            | 1                              | 0                               | 0                                   | 0                                      | 0                         | 0                          | 0                        |
| October 2013 | B1A08 | 0                         | 0                    | 0                            | 0                              | 0                               | 0                                   | 0                                      | 0                         | 0                          | 0                        |
| October 2013 | B1A11 | 0                         | 29                   | 0                            | 3                              | 0                               | 0                                   | 1                                      | 0                         | 0                          | 0                        |
| October 2013 | B1A12 | 0                         | 1                    | 0                            | 0                              | 0                               | 0                                   | 0                                      | 0                         | 0                          | 0                        |
| October 2013 | B1A13 | 0                         | 0                    | 0                            | 0                              | 0                               | 0                                   | 0                                      | 0                         | 0                          | 0                        |
| October 2013 | B1A14 | 0                         | 68                   | 8                            | 0                              | 22                              | 0                                   | 13                                     | 0                         | 0                          | 0                        |
| October 2013 | B1A15 | 0                         | 0                    | 0                            | 0                              | 0                               | 0                                   | 0                                      | 0                         | 0                          | 0                        |
| October 2013 | B1A16 | 0                         | 16                   | 0                            | 0                              | 0                               | 0                                   | 0                                      | 0                         | 0                          | 0                        |
| October 2013 | B1A17 | 0                         | 3                    | 0                            | 0                              | 0                               | 0                                   | 0                                      | 0                         | 0                          | 0                        |
| October 2013 | B1A18 | 0                         | 0                    | 0                            | 0                              | 0                               | 0                                   | 0                                      | 0                         | 0                          | 0                        |
| October 2013 | B1A19 | 0                         | 0                    | 0                            | 0                              | 0                               | 0                                   | 0                                      | 0                         | 0                          | 0                        |
| October 2013 | B1A20 | 0                         | 0                    | 0                            | 0                              | 0                               | 0                                   | 1                                      | 0                         | 0                          | 0                        |
| October 2013 | B1A21 | 0                         | 0                    | 0                            | 0                              | 0                               | 0                                   | 1                                      | 0                         | 0                          | 0                        |
| October 2013 | B1A22 | 0                         | 0                    | 0                            | 0                              | 0                               | 0                                   | 1                                      | 0                         | 0                          | 0                        |
| October 2013 | B4A01 | 0                         | 0                    | 0                            | 0                              | 0                               | 0                                   | 0                                      | 0                         | 0                          | 0                        |
| October 2013 | B4A02 | 0                         | 5                    | 0                            | 0                              | 0                               | 0                                   | 0                                      | 0                         | 0                          | 0                        |
| October 2013 | B4A04 | 0                         | 0                    | 0                            | 0                              | 0                               | 0                                   | 0                                      | 1                         | 0                          | 0                        |
| October 2013 | B4A06 | 0                         | 0                    | 0                            | 0                              | 0                               | 0                                   | 0                                      | 0                         | 0                          | 0                        |
| October 2013 | B4A07 | 0                         | 7                    | 0                            | 0                              | 0                               | 0                                   | 0                                      | 0                         | 0                          | 0                        |
| October 2013 | B4A08 | 0                         | 0                    | 0                            | 0                              | 21                              | 0                                   | 0                                      | 8                         | 0                          | 0                        |
| October 2013 | B4A09 | 0                         | 0                    | 0                            | 0                              | 0                               | 0                                   | 2                                      | 0                         | 0                          | 0                        |
| October 2013 | B4A10 | 0                         | 5                    | 0                            | 0                              | 0                               | 0                                   | 1                                      | 0                         | 0                          | 0                        |
| October 2013 | B4A11 | 0                         | 0                    | 0                            | 0                              | 0                               | 0                                   | 0                                      | 0                         | 0                          | 0                        |
| October 2013 | B4A12 | 0                         | 5                    | 0                            | 0                              | 1                               | 0                                   | 0                                      | 0                         | 0                          | 0                        |

| Date         | Plot  | <i>Liebstadia similis</i> | <i>Oppiella nova</i> | <i>Punctoribates punctum</i> | <i>Rhysotritia ardua ardua</i> | <i>Scheloribates laevigatus</i> | <i>Tectocepheus velatus velatus</i> | <i>Tectocepheus velatus sarekensis</i> | <i>Oribatula excavata</i> | <i>Nothrus anauniensis</i> | <i>Nothrus pratensis</i> |
|--------------|-------|---------------------------|----------------------|------------------------------|--------------------------------|---------------------------------|-------------------------------------|----------------------------------------|---------------------------|----------------------------|--------------------------|
| October 2013 | B4A13 | 0                         | 0                    | 0                            | 0                              | 0                               | 0                                   | 0                                      | 0                         | 0                          | 0                        |
| October 2013 | B4A14 | 0                         | 2                    | 0                            | 0                              | 0                               | 0                                   | 1                                      | 0                         | 0                          | 0                        |
| October 2013 | B4A15 | 0                         | 14                   | 0                            | 0                              | 0                               | 0                                   | 1                                      | 0                         | 0                          | 0                        |
| October 2013 | B4A16 | 0                         | 0                    | 0                            | 0                              | 0                               | 0                                   | 0                                      | 0                         | 0                          | 0                        |
| October 2013 | B4A17 | 0                         | 1                    | 0                            | 0                              | 0                               | 0                                   | 0                                      | 0                         | 0                          | 0                        |
| October 2013 | B4A18 | 0                         | 0                    | 0                            | 0                              | 0                               | 0                                   | 1                                      | 0                         | 0                          | 0                        |
| October 2013 | B4A20 | 0                         | 0                    | 0                            | 0                              | 0                               | 0                                   | 0                                      | 0                         | 0                          | 0                        |
| October 2013 | B4A21 | 0                         | 1                    | 0                            | 0                              | 0                               | 0                                   | 4                                      | 0                         | 0                          | 0                        |
| October 2013 | B4A22 | 0                         | 4                    | 0                            | 0                              | 0                               | 0                                   | 1                                      | 0                         | 0                          | 0                        |
| October 2013 | B2A01 | 0                         | 4                    | 0                            | 0                              | 0                               | 0                                   | 1                                      | 0                         | 0                          | 0                        |
| October 2013 | B2A02 | 0                         | 5                    | 0                            | 0                              | 2                               | 0                                   | 10                                     | 0                         | 0                          | 0                        |
| October 2013 | B2A03 | 0                         | 3                    | 0                            | 0                              | 0                               | 0                                   | 2                                      | 0                         | 0                          | 0                        |
| October 2013 | B2A04 | 0                         | 1                    | 0                            | 0                              | 0                               | 0                                   | 0                                      | 0                         | 0                          | 0                        |
| October 2013 | B2A05 | 0                         | 2                    | 0                            | 0                              | 0                               | 0                                   | 0                                      | 0                         | 0                          | 0                        |
| October 2013 | B2A06 | 0                         | 5                    | 2                            | 0                              | 0                               | 0                                   | 0                                      | 0                         | 0                          | 0                        |
| October 2013 | B2A08 | 0                         | 5                    | 1                            | 0                              | 0                               | 0                                   | 0                                      | 0                         | 0                          | 0                        |
| October 2013 | B2A09 | 0                         | 3                    | 5                            | 0                              | 0                               | 0                                   | 0                                      | 0                         | 0                          | 0                        |
| October 2013 | B2A10 | 0                         | 0                    | 0                            | 0                              | 0                               | 0                                   | 0                                      | 0                         | 0                          | 0                        |
| October 2013 | B2A12 | 0                         | 2                    | 0                            | 0                              | 1                               | 0                                   | 0                                      | 0                         | 0                          | 0                        |
| October 2013 | B2A13 | 0                         | 0                    | 0                            | 0                              | 0                               | 0                                   | 0                                      | 0                         | 0                          | 0                        |
| October 2013 | B2A14 | 0                         | 2                    | 0                            | 0                              | 0                               | 0                                   | 0                                      | 0                         | 0                          | 0                        |
| October 2013 | B2A15 | 0                         | 0                    | 0                            | 0                              | 0                               | 0                                   | 0                                      | 0                         | 0                          | 0                        |
| October 2013 | B2A16 | 0                         | 0                    | 0                            | 0                              | 0                               | 0                                   | 0                                      | 0                         | 0                          | 0                        |
| October 2013 | B2A17 | 0                         | 0                    | 0                            | 0                              | 0                               | 0                                   | 0                                      | 0                         | 0                          | 0                        |
| October 2013 | B2A18 | 0                         | 0                    | 0                            | 0                              | 0                               | 0                                   | 0                                      | 0                         | 0                          | 0                        |
| October 2013 | B2A19 | 0                         | 1                    | 0                            | 2                              | 0                               | 0                                   | 0                                      | 0                         | 0                          | 0                        |
| October 2013 | B2A20 | 0                         | 0                    | 0                            | 0                              | 0                               | 0                                   | 0                                      | 0                         | 0                          | 0                        |
| October 2013 | B2A21 | 0                         | 7                    | 5                            | 0                              | 0                               | 0                                   | 1                                      | 0                         | 0                          | 0                        |
| October 2013 | B2A22 | 0                         | 0                    | 5                            | 0                              | 0                               | 0                                   | 2                                      | 0                         | 0                          | 0                        |
| October 2013 | B3A01 | 0                         | 0                    | 0                            | 0                              | 5                               | 0                                   | 0                                      | 0                         | 0                          | 0                        |
| October 2013 | B3A02 | 0                         | 0                    | 0                            | 0                              | 0                               | 0                                   | 0                                      | 0                         | 0                          | 0                        |
| October 2013 | B3A03 | 0                         | 0                    | 0                            | 0                              | 0                               | 0                                   | 0                                      | 0                         | 0                          | 0                        |
| October 2013 | B3A04 | 0                         | 0                    | 0                            | 0                              | 0                               | 0                                   | 0                                      | 0                         | 0                          | 0                        |
| October 2013 | B3A05 | 0                         | 0                    | 0                            | 0                              | 0                               | 0                                   | 1                                      | 0                         | 0                          | 0                        |
| October 2013 | B3A06 | 0                         | 1                    | 0                            | 0                              | 0                               | 0                                   | 0                                      | 0                         | 0                          | 0                        |
| October 2013 | B3A07 | 0                         | 0                    | 0                            | 0                              | 0                               | 0                                   | 2                                      | 0                         | 0                          | 0                        |
| October 2013 | B3A08 | 0                         | 1                    | 0                            | 0                              | 0                               | 0                                   | 0                                      | 0                         | 0                          | 0                        |
| October 2013 | B3A09 | 0                         | 0                    | 0                            | 0                              | 0                               | 0                                   | 1                                      | 0                         | 0                          | 0                        |

| Date         | Plot  | <i>Liebstadia similis</i> | <i>Oppiella nova</i> | <i>Punctoribates punctum</i> | <i>Rhysotritia ardua ardua</i> | <i>Scheloribates laevigatus</i> | <i>Tectocepheus velatus velatus</i> | <i>Tectocepheus velatus sarekensis</i> | <i>Oribatula excavata</i> | <i>Nothrus anauniensis</i> | <i>Nothrus pratensis</i> |
|--------------|-------|---------------------------|----------------------|------------------------------|--------------------------------|---------------------------------|-------------------------------------|----------------------------------------|---------------------------|----------------------------|--------------------------|
| October 2013 | B3A11 | 0                         | 22                   | 2                            | 0                              | 13                              | 0                                   | 2                                      | 0                         | 0                          | 0                        |
| October 2013 | B3A12 | 0                         | 0                    | 0                            | 0                              | 0                               | 0                                   | 1                                      | 0                         | 0                          | 0                        |
| October 2013 | B3A13 | 0                         | 0                    | 0                            | 0                              | 0                               | 0                                   | 0                                      | 0                         | 0                          | 0                        |
| October 2013 | B3A14 | 0                         | 0                    | 0                            | 0                              | 0                               | 0                                   | 0                                      | 0                         | 0                          | 0                        |
| October 2013 | B3A16 | 0                         | 0                    | 0                            | 0                              | 0                               | 0                                   | 0                                      | 0                         | 0                          | 0                        |
| October 2013 | B3A17 | 0                         | 0                    | 0                            | 0                              | 0                               | 0                                   | 0                                      | 0                         | 0                          | 0                        |
| October 2013 | B3A19 | 0                         | 12                   | 0                            | 0                              | 0                               | 0                                   | 0                                      | 0                         | 0                          | 0                        |
| October 2013 | B3A20 | 0                         | 0                    | 0                            | 0                              | 0                               | 0                                   | 0                                      | 0                         | 0                          | 0                        |
| October 2013 | B3A21 | 0                         | 1                    | 0                            | 0                              | 0                               | 0                                   | 0                                      | 0                         | 0                          | 0                        |
| October 2013 | B3A22 | 0                         | 0                    | 0                            | 0                              | 0                               | 0                                   | 0                                      | 0                         | 0                          | 0                        |
| October 2013 | B3A23 | 0                         | 1                    | 0                            | 0                              | 0                               | 0                                   | 0                                      | 0                         | 0                          | 0                        |
| October 2013 | B3A24 | 0                         | 0                    | 0                            | 0                              | 0                               | 0                                   | 1                                      | 0                         | 0                          | 0                        |













| Date         | Plot  | <i>Ceratozetes psammophilus</i> | <i>Scheloribates initialis</i> | <i>Micropoppia minus</i> | <i>Zygoribatula frisiae</i> | <i>Protoribates capucinus</i> | <i>Tectocepheus minor</i> | <i>Hypochthonius rufulus</i> | <i>Steganacarus striculus</i> |
|--------------|-------|---------------------------------|--------------------------------|--------------------------|-----------------------------|-------------------------------|---------------------------|------------------------------|-------------------------------|
| October 2013 | B4A13 | 0                               | 0                              | 0                        | 0                           | 0                             | 0                         | 0                            | 0                             |
| October 2013 | B4A14 | 0                               | 0                              | 0                        | 0                           | 0                             | 0                         | 0                            | 0                             |
| October 2013 | B4A15 | 0                               | 0                              | 0                        | 0                           | 0                             | 0                         | 0                            | 0                             |
| October 2013 | B4A16 | 0                               | 0                              | 0                        | 0                           | 0                             | 0                         | 0                            | 0                             |
| October 2013 | B4A17 | 0                               | 0                              | 1                        | 0                           | 0                             | 0                         | 0                            | 0                             |
| October 2013 | B4A18 | 0                               | 0                              | 0                        | 0                           | 0                             | 0                         | 0                            | 0                             |
| October 2013 | B4A20 | 0                               | 0                              | 0                        | 0                           | 0                             | 0                         | 0                            | 0                             |
| October 2013 | B4A21 | 0                               | 0                              | 0                        | 0                           | 0                             | 0                         | 0                            | 0                             |
| October 2013 | B4A22 | 0                               | 0                              | 0                        | 0                           | 0                             | 0                         | 0                            | 0                             |
| October 2013 | B2A01 | 0                               | 0                              | 0                        | 0                           | 0                             | 0                         | 0                            | 0                             |
| October 2013 | B2A02 | 0                               | 0                              | 0                        | 30                          | 0                             | 2                         | 0                            | 0                             |
| October 2013 | B2A03 | 0                               | 0                              | 0                        | 0                           | 0                             | 1                         | 0                            | 0                             |
| October 2013 | B2A04 | 0                               | 0                              | 0                        | 1                           | 0                             | 0                         | 0                            | 0                             |
| October 2013 | B2A05 | 0                               | 0                              | 0                        | 0                           | 0                             | 0                         | 0                            | 0                             |
| October 2013 | B2A06 | 0                               | 0                              | 0                        | 0                           | 0                             | 0                         | 1                            | 0                             |
| October 2013 | B2A08 | 6                               | 0                              | 0                        | 0                           | 0                             | 0                         | 0                            | 0                             |
| October 2013 | B2A09 | 0                               | 0                              | 0                        | 0                           | 0                             | 3                         | 0                            | 0                             |
| October 2013 | B2A10 | 0                               | 0                              | 0                        | 0                           | 0                             | 0                         | 0                            | 0                             |
| October 2013 | B2A12 | 0                               | 0                              | 0                        | 0                           | 0                             | 0                         | 0                            | 0                             |
| October 2013 | B2A13 | 0                               | 0                              | 0                        | 0                           | 0                             | 0                         | 0                            | 0                             |
| October 2013 | B2A14 | 0                               | 0                              | 0                        | 0                           | 0                             | 0                         | 0                            | 0                             |
| October 2013 | B2A15 | 0                               | 0                              | 0                        | 0                           | 0                             | 0                         | 0                            | 0                             |
| October 2013 | B2A16 | 0                               | 0                              | 0                        | 0                           | 0                             | 0                         | 0                            | 0                             |
| October 2013 | B2A17 | 0                               | 0                              | 0                        | 0                           | 0                             | 0                         | 0                            | 0                             |
| October 2013 | B2A18 | 0                               | 0                              | 0                        | 0                           | 0                             | 0                         | 0                            | 0                             |
| October 2013 | B2A19 | 0                               | 0                              | 0                        | 1                           | 0                             | 0                         | 0                            | 0                             |
| October 2013 | B2A20 | 0                               | 0                              | 0                        | 0                           | 0                             | 0                         | 0                            | 0                             |
| October 2013 | B2A21 | 0                               | 0                              | 0                        | 0                           | 0                             | 0                         | 0                            | 1                             |
| October 2013 | B2A22 | 0                               | 0                              | 0                        | 0                           | 0                             | 0                         | 0                            | 0                             |
| October 2013 | B3A01 | 0                               | 0                              | 0                        | 0                           | 0                             | 0                         | 0                            | 0                             |
| October 2013 | B3A02 | 1                               | 0                              | 0                        | 0                           | 0                             | 0                         | 0                            | 0                             |
| October 2013 | B3A03 | 0                               | 0                              | 0                        | 0                           | 0                             | 0                         | 0                            | 0                             |
| October 2013 | B3A04 | 0                               | 0                              | 0                        | 0                           | 0                             | 0                         | 0                            | 0                             |
| October 2013 | B3A05 | 0                               | 0                              | 0                        | 0                           | 0                             | 0                         | 0                            | 0                             |
| October 2013 | B3A06 | 0                               | 0                              | 0                        | 0                           | 0                             | 0                         | 0                            | 0                             |
| October 2013 | B3A07 | 0                               | 0                              | 0                        | 0                           | 0                             | 0                         | 0                            | 0                             |
| October 2013 | B3A08 | 0                               | 0                              | 0                        | 0                           | 0                             | 0                         | 0                            | 0                             |
| October 2013 | B3A09 | 1                               | 0                              | 0                        | 0                           | 0                             | 0                         | 0                            | 0                             |
