# Supplementary material for: Response of Collembola and Acari communities to summer flooding in a grassland plant diversity experiment
Source: PubMed Central journal article supplement (PMC6117009; doi:10.1371/journal.pone.0202862), 2018-08-30
Supplement: pone.0202862.s006.pdf [file pone.0202862.s006.pdf]

## Dataset

Abundance  
Type  
Unit

Families of Collembola  
raw

individuals in soil cores of 5 cm diameter and 5 cm depth

| Date          | Plot  | Total Collembola | Entomobryidae | Isotomidae | Tullbergiidae |
|---------------|-------|------------------|---------------|------------|---------------|
| November 2010 | B1A01 | 11               | 10            | 1          | 0             |
| November 2010 | B1A02 | 37               | 1             | 20         | 11            |
| November 2010 | B1A03 | 33               | 14            | 7          | 5             |
| November 2010 | B1A04 | 59               | 10            | 34         | 11            |
| November 2010 | B1A05 | 22               | 5             | 6          | 3             |
| November 2010 | B1A06 | 54               | 5             | 22         | 22            |
| November 2010 | B1A07 | 27               | 1             | 0          | 19            |
| November 2010 | B1A08 | 23               | 6             | 8          | 4             |
| November 2010 | B1A11 | 39               | 26            | 10         | 1             |
| November 2010 | B1A12 | 11               | 10            | 1          | 0             |
| November 2010 | B1A13 | 31               | 3             | 19         | 3             |
| November 2010 | B1A14 | 4                | 0             | 2          | 0             |
| November 2010 | B1A15 | 0                | 0             | 0          | 0             |
| November 2010 | B1A16 | 24               | 9             | 1          | 2             |
| November 2010 | B1A17 | 65               | 10            | 4          | 33            |
| November 2010 | B1A18 | 0                | 0             | 0          | 0             |
| November 2010 | B1A19 | 40               | 11            | 9          | 16            |
| November 2010 | B1A20 | 83               | 18            | 12         | 26            |
| November 2010 | B1A21 | 48               | 14            | 6          | 14            |
| November 2010 | B1A22 | 27               | 16            | 1          | 6             |
| November 2010 | B2A01 | 23               | 7             | 1          | 10            |
| November 2010 | B2A02 | 0                | 0             | 0          | 0             |
| November 2010 | B2A03 | 18               | 6             | 5          | 3             |
| November 2010 | B2A04 | 13               | 5             | 0          | 8             |
| November 2010 | B2A05 | 36               | 8             | 1          | 15            |
| November 2010 | B2A06 | 60               | 12            | 23         | 9             |
| November 2010 | B2A08 | 87               | 4             | 12         | 29            |
| November 2010 | B2A09 | 57               | 4             | 6          | 32            |
| November 2010 | B2A10 | 182              | 4             | 92         | 68            |
| November 2010 | B2A12 | 24               | 6             | 1          | 17            |
| November 2010 | B2A13 | 11               | 7             | 0          | 4             |
| November 2010 | B2A14 | 16               | 0             | 2          | 5             |
| November 2010 | B2A15 | 25               | 11            | 0          | 14            |
| November 2010 | B2A16 | 51               | 8             | 1          | 34            |
| November 2010 | B2A17 | 19               | 15            | 1          | 3             |
| November 2010 | B2A18 | 92               | 22            | 11         | 7             |
| November 2010 | B2A19 | 4                | 0             | 1          | 2             |
| November 2010 | B2A20 | 89               | 11            | 9          | 5             |
| November 2010 | B2A21 | 111              | 7             | 12         | 80            |
| November 2010 | B2A22 | 4                | 0             | 4          | 0             |
| November 2010 | B3A01 | 17               | 9             | 1          | 5             |
| November 2010 | B3A02 | 39               | 4             | 3          | 24            |
| November 2010 | B3A03 | 2                | 0             | 0          | 1             |
| November 2010 | B3A04 | 84               | 26            | 26         | 14            |

| Date          | Plot  | Total Collembola | Entomobryidae | Isotomidae | Tullbergiidae |
|---------------|-------|------------------|---------------|------------|---------------|
| November 2010 | B3A05 | 40               | 16            | 5          | 5             |
| November 2010 | B3A06 | 46               | 23            | 4          | 14            |
| November 2010 | B3A07 | 3                | 0             | 1          | 1             |
| November 2010 | B3A08 | 49               | 4             | 9          | 9             |
| November 2010 | B3A09 | 49               | 8             | 18         | 1             |
| November 2010 | B3A11 | 36               | 3             | 15         | 0             |
| November 2010 | B3A12 | 28               | 9             | 8          | 10            |
| November 2010 | B3A13 | 37               | 14            | 11         | 10            |
| November 2010 | B3A14 | 32               | 11            | 16         | 2             |
| November 2010 | B3A16 | 31               | 5             | 9          | 12            |
| November 2010 | B3A17 | 13               | 3             | 5          | 1             |
| November 2010 | B3A19 | 89               | 8             | 25         | 38            |
| November 2010 | B3A20 | 40               | 28            | 1          | 9             |
| November 2010 | B3A21 | 2                | 0             | 2          | 0             |
| November 2010 | B3A22 | 43               | 23            | 5          | 3             |
| November 2010 | B3A23 | 57               | 25            | 24         | 3             |
| November 2010 | B3A24 | 52               | 43            | 6          | 2             |
| November 2010 | B4A01 | 58               | 13            | 14         | 13            |
| November 2010 | B4A02 | 6                | 2             | 0          | 4             |
| November 2010 | B4A04 | 52               | 28            | 14         | 5             |
| November 2010 | B4A06 | 9                | 2             | 1          | 6             |
| November 2010 | B4A07 | 22               | 9             | 3          | 4             |
| November 2010 | B4A08 | 31               | 3             | 11         | 13            |
| November 2010 | B4A09 | 57               | 13            | 3          | 18            |
| November 2010 | B4A10 | 20               | 9             | 4          | 4             |
| November 2010 | B4A11 | 40               | 17            | 16         | 2             |
| November 2010 | B4A12 | 24               | 13            | 6          | 5             |
| November 2010 | B4A13 | 9                | 2             | 1          | 6             |
| November 2010 | B4A14 | 36               | 14            | 2          | 20            |
| November 2010 | B4A15 | 40               | 10            | 2          | 10            |
| November 2010 | B4A16 | 8                | 3             | 0          | 5             |
| November 2010 | B4A17 | 27               | 10            | 1          | 7             |
| November 2010 | B4A18 | 30               | 19            | 2          | 7             |
| November 2010 | B4A20 | 9                | 2             | 1          | 6             |
| November 2010 | B4A21 | 13               | 1             | 0          | 10            |
| November 2010 | B4A22 | 18               | 15            | 0          | 3             |
| July 2013     | B1A01 | 1                | 0             | 0          | 0             |
| July 2013     | B1A02 | 0                | 0             | 0          | 0             |
| July 2013     | B1A03 | 0                | 0             | 0          | 0             |
| July 2013     | B1A04 | 0                | 0             | 0          | 0             |
| July 2013     | B1A05 | 0                | 0             | 0          | 0             |
| July 2013     | B1A06 | 0                | 0             | 0          | 0             |
| July 2013     | B1A07 | 0                | 0             | 0          | 0             |
| July 2013     | B1A08 | 0                | 0             | 0          | 0             |
| July 2013     | B1A11 | 1                | 0             | 1          | 0             |
| July 2013     | B1A12 | 1                | 0             | 1          | 0             |
| July 2013     | B1A13 | 0                | 0             | 0          | 0             |
| July 2013     | B1A14 | 2                | 0             | 0          | 0             |
| July 2013     | B1A15 | 0                | 0             | 0          | 0             |

| Date      | Plot  | Total Collembola | Entomobryidae | Isotomidae | Tullbergiidae |
|-----------|-------|------------------|---------------|------------|---------------|
| July 2013 | B1A16 | 0                | 0             | 0          | 0             |
| July 2013 | B1A17 | 0                | 0             | 0          | 0             |
| July 2013 | B1A18 | 0                | 0             | 0          | 0             |
| July 2013 | B1A19 | 0                | 0             | 0          | 0             |
| July 2013 | B1A20 | 1                | 0             | 0          | 1             |
| July 2013 | B1A21 | 0                | 0             | 0          | 0             |
| July 2013 | B1A22 | 1                | 0             | 0          | 1             |
| July 2013 | B2A01 | 1                | 0             | 1          | 0             |
| July 2013 | B2A02 | 0                | 0             | 0          | 0             |
| July 2013 | B2A03 | 0                | 0             | 0          | 0             |
| July 2013 | B2A04 | 0                | 0             | 0          | 0             |
| July 2013 | B2A05 | 0                | 0             | 0          | 0             |
| July 2013 | B2A06 | 2                | 1             | 1          | 0             |
| July 2013 | B2A08 | 0                | 0             | 0          | 0             |
| July 2013 | B2A09 | 0                | 0             | 0          | 0             |
| July 2013 | B2A10 | 0                | 0             | 0          | 0             |
| July 2013 | B2A12 | 10               | 8             | 2          | 0             |
| July 2013 | B2A13 | 1                | 0             | 0          | 0             |
| July 2013 | B2A14 | 2                | 0             | 1          | 1             |
| July 2013 | B2A15 | 0                | 0             | 0          | 0             |
| July 2013 | B2A16 | 13               | 7             | 4          | 0             |
| July 2013 | B2A17 | 1                | 0             | 0          | 0             |
| July 2013 | B2A18 | 0                | 0             | 0          | 0             |
| July 2013 | B2A19 | 0                | 0             | 0          | 0             |
| July 2013 | B2A20 | 0                | 0             | 0          | 0             |
| July 2013 | B2A21 | 1                | 1             | 0          | 0             |
| July 2013 | B2A22 | 0                | 0             | 0          | 0             |
| July 2013 | B3A01 | 0                | 0             | 0          | 0             |
| July 2013 | B3A02 | 0                | 0             | 0          | 0             |
| July 2013 | B3A03 | 0                | 0             | 0          | 0             |
| July 2013 | B3A04 | 0                | 0             | 0          | 0             |
| July 2013 | B3A05 | 0                | 0             | 0          | 0             |
| July 2013 | B3A06 | 0                | 0             | 0          | 0             |
| July 2013 | B3A07 | 0                | 0             | 0          | 0             |
| July 2013 | B3A08 | 0                | 0             | 0          | 0             |
| July 2013 | B3A09 | 2                | 2             | 0          | 0             |
| July 2013 | B3A11 | 0                | 0             | 0          | 0             |
| July 2013 | B3A12 | 0                | 0             | 0          | 0             |
| July 2013 | B3A13 | 2                | 2             | 0          | 0             |
| July 2013 | B3A14 | 0                | 0             | 0          | 0             |
| July 2013 | B3A16 | 1                | 0             | 1          | 0             |
| July 2013 | B3A17 | 0                | 0             | 0          | 0             |
| July 2013 | B3A19 | 0                | 0             | 0          | 0             |
| July 2013 | B3A20 | 0                | 0             | 0          | 0             |
| July 2013 | B3A21 | 0                | 0             | 0          | 0             |
| July 2013 | B3A22 | 2                | 0             | 1          | 0             |
| July 2013 | B3A23 | 1                | 0             | 1          | 0             |
| July 2013 | B3A24 | 0                | 0             | 0          | 0             |
| July 2013 | B4A01 | 0                | 0             | 0          | 0             |

| Date         | Plot  | Total Collembola | Entomobryidae | Isotomidae | Tullbergiidae |
|--------------|-------|------------------|---------------|------------|---------------|
| July 2013    | B4A02 | 1                | 0             | 1          | 0             |
| July 2013    | B4A04 | 2                | 1             | 1          | 0             |
| July 2013    | B4A06 | 2                | 0             | 2          | 0             |
| July 2013    | B4A07 | 0                | 0             | 0          | 0             |
| July 2013    | B4A08 | 0                | 0             | 0          | 0             |
| July 2013    | B4A09 | 13               | 12            | 1          | 0             |
| July 2013    | B4A10 | 1                | 1             | 0          | 0             |
| July 2013    | B4A11 | 0                | 0             | 0          | 0             |
| July 2013    | B4A12 | 0                | 0             | 0          | 0             |
| July 2013    | B4A13 | 0                | 0             | 0          | 0             |
| July 2013    | B4A14 | 2                | 0             | 0          | 0             |
| July 2013    | B4A15 | 0                | 0             | 0          | 0             |
| July 2013    | B4A16 | 0                | 0             | 0          | 0             |
| July 2013    | B4A17 | 1                | 1             | 0          | 0             |
| July 2013    | B4A18 | 2                | 2             | 0          | 0             |
| July 2013    | B4A20 | 0                | 0             | 0          | 0             |
| July 2013    | B4A21 | 1                | 1             | 0          | 0             |
| July 2013    | B4A22 | 0                | 0             | 0          | 0             |
| October 2013 | B1A01 | 47               | 24            | 22         | 0             |
| October 2013 | B1A02 | 6                | 6             | 0          | 0             |
| October 2013 | B1A03 | 38               | 2             | 35         | 0             |
| October 2013 | B1A04 | 26               | 14            | 12         | 0             |
| October 2013 | B1A05 | 0                | 0             | 0          | 0             |
| October 2013 | B1A06 | 85               | 10            | 49         | 8             |
| October 2013 | B1A07 | 90               | 55            | 31         | 0             |
| October 2013 | B1A08 | 10               | 7             | 2          | 1             |
| October 2013 | B1A11 | 12               | 2             | 1          | 9             |
| October 2013 | B1A12 | 9                | 3             | 5          | 1             |
| October 2013 | B1A13 | 0                | 0             | 0          | 0             |
| October 2013 | B1A14 | 15               | 10            | 1          | 1             |
| October 2013 | B1A15 | 9                | 4             | 2          | 1             |
| October 2013 | B1A16 | 15               | 5             | 0          | 9             |
| October 2013 | B1A17 | 23               | 7             | 16         | 0             |
| October 2013 | B1A18 | 21               | 19            | 1          | 1             |
| October 2013 | B1A19 | 15               | 8             | 0          | 5             |
| October 2013 | B1A20 | 65               | 4             | 1          | 57            |
| October 2013 | B1A21 | 24               | 9             | 15         | 0             |
| October 2013 | B1A22 | 65               | 6             | 11         | 48            |
| October 2013 | B2A01 | 26               | 9             | 1          | 13            |
| October 2013 | B2A02 | 100              | 57            | 21         | 7             |
| October 2013 | B2A03 | 31               | 7             | 4          | 20            |
| October 2013 | B2A04 | 5                | 4             | 0          | 0             |
| October 2013 | B2A05 | 14               | 1             | 12         | 0             |
| October 2013 | B2A06 | 4                | 4             | 0          | 0             |
| October 2013 | B2A08 | 12               | 6             | 6          | 0             |
| October 2013 | B2A09 | 62               | 2             | 0          | 59            |
| October 2013 | B2A10 | 39               | 8             | 15         | 16            |
| October 2013 | B2A12 | 27               | 16            | 0          | 11            |
| October 2013 | B2A13 | 6                | 4             | 2          | 0             |

| Date         | Plot  | Total Collembola | Entomobryidae | Isotomidae | Tullbergiidae |
|--------------|-------|------------------|---------------|------------|---------------|
| October 2013 | B2A14 | 34               | 5             | 15         | 13            |
| October 2013 | B2A15 | 26               | 23            | 3          | 0             |
| October 2013 | B2A16 | 87               | 43            | 34         | 10            |
| October 2013 | B2A17 | 78               | 13            | 10         | 55            |
| October 2013 | B2A18 | 90               | 1             | 34         | 55            |
| October 2013 | B2A19 | 134              | 39            | 33         | 62            |
| October 2013 | B2A20 | 4                | 2             | 1          | 1             |
| October 2013 | B2A21 | 32               | 12            | 11         | 8             |
| October 2013 | B2A22 | 124              | 90            | 20         | 14            |
| October 2013 | B3A01 | 90               | 66            | 14         | 10            |
| October 2013 | B3A02 | 34               | 30            | 4          | 0             |
| October 2013 | B3A03 | 3                | 3             | 0          | 0             |
| October 2013 | B3A04 | 8                | 2             | 0          | 6             |
| October 2013 | B3A05 | 48               | 30            | 15         | 3             |
| October 2013 | B3A06 | 38               | 24            | 6          | 8             |
| October 2013 | B3A07 | 131              | 109           | 14         | 8             |
| October 2013 | B3A08 | 13               | 3             | 5          | 5             |
| October 2013 | B3A09 | 7                | 4             | 2          | 1             |
| October 2013 | B3A11 | 28               | 9             | 11         | 8             |
| October 2013 | B3A12 | 61               | 42            | 16         | 3             |
| October 2013 | B3A13 | 8                | 7             | 1          | 0             |
| October 2013 | B3A14 | 116              | 32            | 12         | 71            |
| October 2013 | B3A16 | 119              | 9             | 0          | 110           |
| October 2013 | B3A17 | 39               | 25            | 14         | 0             |
| October 2013 | B3A19 | 78               | 71            | 7          | 0             |
| October 2013 | B3A20 | 13               | 3             | 2          | 8             |
| October 2013 | B3A21 | 12               | 4             | 6          | 2             |
| October 2013 | B3A22 | 63               | 58            | 5          | 0             |
| October 2013 | B3A23 | 15               | 8             | 6          | 0             |
| October 2013 | B3A24 | 45               | 10            | 15         | 20            |
| October 2013 | B4A01 | 55               | 16            | 17         | 22            |
| October 2013 | B4A02 | 59               | 53            | 2          | 3             |
| October 2013 | B4A04 | 18               | 3             | 4          | 11            |
| October 2013 | B4A06 | 26               | 15            | 11         | 0             |
| October 2013 | B4A07 | 51               | 31            | 4          | 16            |
| October 2013 | B4A08 | 108              | 85            | 17         | 5             |
| October 2013 | B4A09 | 36               | 5             | 13         | 4             |
| October 2013 | B4A10 | 45               | 6             | 26         | 10            |
| October 2013 | B4A11 | 16               | 2             | 8          | 6             |
| October 2013 | B4A12 | 10               | 6             | 2          | 2             |
| October 2013 | B4A13 | 18               | 0             | 2          | 16            |
| October 2013 | B4A14 | 62               | 22            | 3          | 36            |
| October 2013 | B4A15 | 43               | 30            | 8          | 0             |
| October 2013 | B4A16 | 13               | 11            | 2          | 0             |
| October 2013 | B4A17 | 8                | 4             | 4          | 0             |
| October 2013 | B4A18 | 14               | 7             | 2          | 4             |
| October 2013 | B4A20 | 44               | 2             | 15         | 27            |
| October 2013 | B4A21 | 33               | 1             | 3          | 28            |
| October 2013 | B4A22 | 35               | 6             | 11         | 18            |
