# Supplementary material for: Response of Collembola and Acari communities to summer flooding in a grassland plant diversity experiment
Source: PubMed Central journal article supplement (PMC6117009; doi:10.1371/journal.pone.0202862), 2018-08-30
Supplement: pone.0202862.s007.pdf [file pone.0202862.s007.pdf]

## Dataset

Abundance Type Unit Orders of Acari raw individuals in soil cores of 5 cm diameter and 5 cm depth

| Date          | Plot  | Total Acari | Oribatida | Gamasina | Prostigmata | Asigmata |
|---------------|-------|-------------|-----------|----------|-------------|----------|
| November 2010 | B1A01 | 74          | 24        | 12       | 37          | 1        |
| November 2010 | B1A02 | 46          | 4         | 26       | 14          | 2        |
| November 2010 | B1A03 | 103         | 53        | 31       | 9           | 10       |
| November 2010 | B1A04 | 284         | 252       | 31       | 1           | 0        |
| November 2010 | B1A05 | 19          | 5         | 13       | 1           | 0        |
| November 2010 | B1A06 | 72          | 24        | 25       | 18          | 5        |
| November 2010 | B1A07 | 42          | 2         | 36       | 4           | 0        |
| November 2010 | B1A08 | 44          | 0         | 35       | 6           | 1        |
| November 2010 | B1A11 | 171         | 146       | 6        | 15          | 4        |
| November 2010 | B1A12 | 15          | 2         | 4        | 0           | 9        |
| November 2010 | B1A14 | 27          | 19        | 6        | 2           | 0        |
| November 2010 | B1A16 | 74          | 1         | 59       | 13          | 1        |
| November 2010 | B1A17 | 16          | 5         | 3        | 8           | 0        |
| November 2010 | B1A19 | 36          | 18        | 13       | 4           | 1        |
| November 2010 | B1A20 | 30          | 15        | 13       | 2           | 0        |
| November 2010 | B1A21 | 59          | 32        | 17       | 10          | 0        |
| November 2010 | B1A22 | 41          | 24        | 3        | 14          | 0        |
| November 2010 | B2A01 | 25          | 3         | 9        | 13          | 0        |
| November 2010 | B2A03 | 47          | 10        | 11       | 11          | 15       |
| November 2010 | B2A04 | 14          | 1         | 4        | 8           | 1        |
| November 2010 | B2A05 | 21          | 12        | 7        | 2           | 0        |
| November 2010 | B2A06 | 52          | 21        | 17       | 14          | 0        |
| November 2010 | B2A08 | 95          | 13        | 33       | 20          | 29       |
| November 2010 | B2A09 | 43          | 14        | 23       | 6           | 0        |
| November 2010 | B2A10 | 65          | 14        | 15       | 4           | 32       |
| November 2010 | B2A12 | 14          | 3         | 9        | 1           | 1        |
| November 2010 | B2A13 | 4           | 2         | 1        | 1           | 0        |
| November 2010 | B2A14 | 36          | 19        | 5        | 3           | 9        |
| November 2010 | B2A15 | 20          | 3         | 13       | 3           | 1        |
| November 2010 | B2A16 | 19          | 1         | 12       | 5           | 1        |
| November 2010 | B2A17 | 21          | 2         | 10       | 1           | 8        |
| November 2010 | B2A18 | 63          | 23        | 31       | 7           | 1        |
| November 2010 | B2A19 | 10          | 7         | 2        | 1           | 0        |
| November 2010 | B2A20 | 65          | 10        | 39       | 10          | 6        |
| November 2010 | B2A21 | 31          | 3         | 11       | 12          | 5        |
| November 2010 | B2A22 | 5           | 1         | 3        | 0           | 1        |
| November 2010 | B3A01 | 6           | 3         | 1        | 1           | 1        |
| November 2010 | B3A02 | 16          | 2         | 10       | 4           | 0        |
| November 2010 | B3A03 | 19          | 1         | 15       | 0           | 3        |
| November 2010 | B3A04 | 176         | 11        | 21       | 18          | 126      |
| November 2010 | B3A05 | 37          | 8         | 9        | 3           | 17       |
| November 2010 | B3A06 | 91          | 41        | 19       | 25          | 6        |
| November 2010 | B3A07 | 4           | 1         | 1        | 0           | 2        |
| November 2010 | B3A08 | 32          | 10        | 16       | 3           | 3        |
| November 2010 | B3A09 | 19          | 11        | 6        | 1           | 1        |

| Date          | Plot  | Total Acari | Oribatida | Gamasina | Prostigmata | Asigmata |
|---------------|-------|-------------|-----------|----------|-------------|----------|
| November 2010 | B3A11 | 56          | 27        | 13       | 9           | 7        |
| November 2010 | B3A12 | 8           | 0         | 7        | 0           | 1        |
| November 2010 | B3A13 | 47          | 15        | 16       | 12          | 4        |
| November 2010 | B3A14 | 24          | 2         | 15       | 7           | 0        |
| November 2010 | B3A16 | 17          | 2         | 11       | 1           | 3        |
| November 2010 | B3A17 | 19          | 0         | 14       | 5           | 0        |
| November 2010 | B3A19 | 41          | 24        | 0        | 12          | 5        |
| November 2010 | B3A20 | 33          | 24        | 7        | 2           | 0        |
| November 2010 | B3A21 | 1           | 0         | 1        | 0           | 0        |
| November 2010 | B3A22 | 120         | 18        | 5        | 89          | 8        |
| November 2010 | B3A23 | 44          | 6         | 6        | 3           | 29       |
| November 2010 | B3A24 | 47          | 12        | 22       | 6           | 7        |
| November 2010 | B4A01 | 108         | 47        | 15       | 35          | 11       |
| November 2010 | B4A02 | 0           | 0         | 0        | 0           | 0        |
| November 2010 | B4A04 | 105         | 64        | 14       | 25          | 2        |
| November 2010 | B4A06 | 18          | 0         | 11       | 0           | 7        |
| November 2010 | B4A07 | 48          | 10        | 14       | 3           | 21       |
| November 2010 | B4A08 | 35          | 10        | 5        | 11          | 9        |
| November 2010 | B4A09 | 12          | 1         | 10       | 1           | 0        |
| November 2010 | B4A10 | 73          | 5         | 18       | 15          | 35       |
| November 2010 | B4A11 | 17          | 0         | 11       | 2           | 4        |
| November 2010 | B4A12 | 9           | 0         | 6        | 0           | 3        |
| November 2010 | B4A13 | 11          | 2         | 7        | 0           | 2        |
| November 2010 | B4A14 | 5           | 0         | 5        | 0           | 0        |
| November 2010 | B4A15 | 7           | 0         | 6        | 0           | 1        |
| November 2010 | B4A17 | 10          | 0         | 5        | 3           | 2        |
| November 2010 | B4A18 | 14          | 1         | 0        | 7           | 6        |
| November 2010 | B4A20 | 2           | 0         | 2        | 0           | 0        |
| November 2010 | B4A21 | 19          | 2         | 13       | 2           | 2        |
| November 2010 | B4A22 | 15          | 0         | 7        | 0           | 8        |
| July 2013     | B1A01 | 10          | 6         | 1        | 0           | 3        |
| July 2013     | B1A02 | 0           | 0         | 0        | 0           | 0        |
| July 2013     | B1A03 | 0           | 0         | 0        | 0           | 0        |
| July 2013     | B1A04 | 0           | 0         | 0        | 0           | 0        |
| July 2013     | B1A05 | 0           | 0         | 0        | 0           | 0        |
| July 2013     | B1A06 | 0           | 0         | 0        | 0           | 0        |
| July 2013     | B1A07 | 0           | 0         | 0        | 0           | 0        |
| July 2013     | B1A08 | 0           | 0         | 0        | 0           | 0        |
| July 2013     | B1A11 | 8           | 3         | 0        | 5           | 0        |
| July 2013     | B1A12 | 2           | 0         | 2        | 0           | 0        |
| July 2013     | B1A13 | 2           | 2         | 0        | 0           | 0        |
| July 2013     | B1A14 | 0           | 0         | 0        | 0           | 0        |
| July 2013     | B1A15 | 6           | 0         | 0        | 5           | 0        |
| July 2013     | B1A16 | 8           | 2         | 0        | 6           | 0        |
| July 2013     | B1A17 | 1           | 0         | 0        | 1           | 0        |
| July 2013     | B1A18 | 3           | 0         | 0        | 3           | 0        |
| July 2013     | B1A19 | 7           | 3         | 0        | 4           | 0        |
| July 2013     | B1A20 | 17          | 4         | 0        | 14          | 0        |
| July 2013     | B1A21 | 16          | 0         | 1        | 14          | 0        |
| July 2013     | B1A22 | 1           | 0         | 1        | 0           | 0        |
| July 2013     | B4A01 | 1           | 0         | 1        | 0           | 0        |

| Date      | Plot  | Total Acari | Oribatida | Gamasina | Prostigmata | Asigmata |
|-----------|-------|-------------|-----------|----------|-------------|----------|
| July 2013 | B4A02 | 3           | 1         | 2        | 0           | 0        |
| July 2013 | B4A04 | 1           | 1         | 0        | 0           | 0        |
| July 2013 | B4A06 | 6           | 1         | 0        | 5           | 0        |
| July 2013 | B4A07 | 2           | 1         | 0        | 1           | 0        |
| July 2013 | B4A08 | 23          | 23        | 0        | 0           | 0        |
| July 2013 | B4A09 | 26          | 9         | 0        | 17          | 0        |
| July 2013 | B4A10 | 3           | 1         | 2        | 0           | 0        |
| July 2013 | B4A11 | 0           | 0         | 0        | 0           | 0        |
| July 2013 | B4A12 | 1           | 1         | 0        | 0           | 0        |
| July 2013 | B4A13 | 1           | 0         | 1        | 0           | 0        |
| July 2013 | B4A14 | 2           | 2         | 0        | 0           | 0        |
| July 2013 | B4A15 | 3           | 1         | 1        | 1           | 0        |
| July 2013 | B4A16 | 0           | 0         | 0        | 0           | 0        |
| July 2013 | B4A17 | 1           | 0         | 0        | 1           | 0        |
| July 2013 | B4A18 | 4           | 3         | 1        | 0           | 0        |
| July 2013 | B4A20 | 0           | 0         | 0        | 0           | 0        |
| July 2013 | B4A21 | 0           | 0         | 0        | 0           | 0        |
| July 2013 | B4A22 | 3           | 0         | 2        | 0           | 1        |
| July 2013 | B2A01 | 9           | 6         | 3        | 0           | 0        |
| July 2013 | B2A02 | 2           | 2         | 0        | 0           | 0        |
| July 2013 | B2A03 | 0           | 0         | 0        | 0           | 0        |
| July 2013 | B2A04 | 0           | 0         | 0        | 0           | 0        |
| July 2013 | B2A05 | 1           | 0         | 0        | 1           | 0        |
| July 2013 | B2A06 | 2           | 0         | 2        | 0           | 0        |
| July 2013 | B2A08 | 10          | 5         | 5        | 0           | 0        |
| July 2013 | B2A09 | 29          | 12        | 2        | 10          | 3        |
| July 2013 | B2A10 | 2           | 0         | 1        | 1           | 0        |
| July 2013 | B2A12 | 5           | 2         | 2        | 1           | 0        |
| July 2013 | B2A13 | 3           | 0         | 0        | 3           | 0        |
| July 2013 | B2A14 | 0           | 0         | 0        | 0           | 0        |
| July 2013 | B2A15 | 0           | 0         | 0        | 0           | 0        |
| July 2013 | B2A16 | 8           | 0         | 1        | 7           | 0        |
| July 2013 | B2A17 | 1           | 0         | 1        | 0           | 0        |
| July 2013 | B2A18 | 2           | 0         | 0        | 2           | 0        |
| July 2013 | B2A19 | 6           | 0         | 0        | 5           | 1        |
| July 2013 | B2A20 | 27          | 0         | 2        | 25          | 0        |
| July 2013 | B2A21 | 9           | 1         | 1        | 7           | 0        |
| July 2013 | B2A22 | 6           | 3         | 0        | 3           | 0        |
| July 2013 | B3A01 | 0           | 0         | 0        | 0           | 0        |
| July 2013 | B3A02 | 5           | 4         | 0        | 1           | 0        |
| July 2013 | B3A03 | 1           | 0         | 0        | 1           | 0        |
| July 2013 | B3A04 | 0           | 0         | 0        | 0           | 0        |
| July 2013 | B3A05 | 0           | 0         | 0        | 0           | 0        |
| July 2013 | B3A06 | 0           | 0         | 0        | 0           | 0        |
| July 2013 | B3A07 | 6           | 0         | 0        | 4           | 2        |
| July 2013 | B3A08 | 2           | 0         | 0        | 2           | 0        |
| July 2013 | B3A09 | 4           | 0         | 0        | 1           | 3        |
| July 2013 | B3A11 | 6           | 5         | 0        | 1           | 0        |
| July 2013 | B3A12 | 6           | 2         | 0        | 3           | 1        |
| July 2013 | B3A13 | 1           | 1         | 0        | 0           | 0        |
| July 2013 | B3A14 | 0           | 0         | 0        | 0           | 0        |

| Date         | Plot  | Total Acari | Oribatida | Gamasina | Prostigmata | Asigmata |
|--------------|-------|-------------|-----------|----------|-------------|----------|
| July 2013    | B3A16 | 1           | 0         | 0        | 1           | 0        |
| July 2013    | B3A17 | 0           | 0         | 0        | 0           | 0        |
| July 2013    | B3A19 | 0           | 0         | 0        | 0           | 0        |
| July 2013    | B3A20 | 0           | 0         | 0        | 0           | 0        |
| July 2013    | B3A21 | 3           | 3         | 0        | 0           | 0        |
| July 2013    | B3A22 | 0           | 0         | 0        | 0           | 0        |
| July 2013    | B3A23 | 0           | 0         | 0        | 0           | 0        |
| July 2013    | B3A24 | 11          | 10        | 0        | 1           | 0        |
| October 2013 | B1A01 | 43          | 21        | 11       | 7           | 2        |
| October 2013 | B1A02 | 20          | 18        | 1        | 1           | 0        |
| October 2013 | B1A03 | 58          | 20        | 22       | 9           | 7        |
| October 2013 | B1A04 | 27          | 7         | 14       | 5           | 0        |
| October 2013 | B1A05 | 0           | 0         | 0        | 0           | 0        |
| October 2013 | B1A06 | 128         | 63        | 20       | 42          | 3        |
| October 2013 | B1A07 | 75          | 20        | 10       | 8           | 37       |
| October 2013 | B1A08 | 0           | 0         | 0        | 0           | 0        |
| October 2013 | B1A11 | 57          | 43        | 3        | 11          | 0        |
| October 2013 | B1A12 | 12          | 1         | 2        | 9           | 0        |
| October 2013 | B1A13 | 2           | 0         | 0        | 1           | 1        |
| October 2013 | B1A14 | 199         | 157       | 30       | 12          | 0        |
| October 2013 | B1A15 | 8           | 2         | 0        | 6           | 0        |
| October 2013 | B1A16 | 101         | 18        | 43       | 40          | 0        |
| October 2013 | B1A17 | 19          | 3         | 1        | 14          | 1        |
| October 2013 | B1A18 | 104         | 0         | 2        | 97          | 5        |
| October 2013 | B1A19 | 23          | 2         | 2        | 19          | 0        |
| October 2013 | B1A20 | 52          | 18        | 11       | 23          | 0        |
| October 2013 | B1A21 | 57          | 11        | 16       | 30          | 0        |
| October 2013 | B1A22 | 30          | 14        | 8        | 7           | 1        |
| October 2013 | B4A01 | 57          | 20        | 2        | 26          | 9        |
| October 2013 | B4A02 | 44          | 13        | 12       | 19          | 0        |
| October 2013 | B4A04 | 51          | 24        | 4        | 23          | 0        |
| October 2013 | B4A06 | 6           | 3         | 3        | 0           | 0        |
| October 2013 | B4A07 | 64          | 14        | 27       | 20          | 3        |
| October 2013 | B4A08 | 194         | 51        | 99       | 35          | 9        |
| October 2013 | B4A09 | 66          | 22        | 6        | 38          | 0        |
| October 2013 | B4A10 | 35          | 10        | 5        | 15          | 5        |
| October 2013 | B4A11 | 7           | 4         | 2        | 1           | 0        |
| October 2013 | B4A12 | 30          | 6         | 1        | 23          | 0        |
| October 2013 | B4A13 | 2           | 0         | 1        | 1           | 0        |
| October 2013 | B4A14 | 14          | 4         | 5        | 5           | 0        |
| October 2013 | B4A15 | 334         | 20        | 17       | 7           | 290      |
| October 2013 | B4A16 | 186         | 3         | 10       | 171         | 2        |
| October 2013 | B4A17 | 20          | 3         | 9        | 6           | 2        |
| October 2013 | B4A18 | 99          | 49        | 9        | 32          | 9        |
| October 2013 | B4A20 | 11          | 6         | 3        | 2           | 0        |
| October 2013 | B4A21 | 34          | 18        | 3        | 13          | 0        |
| October 2013 | B4A22 | 120         | 18        | 6        | 12          | 84       |
| October 2013 | B2A01 | 23          | 18        | 5        | 0           | 0        |
| October 2013 | B2A02 | 115         | 103       | 8        | 4           | 0        |
| October 2013 | B2A03 | 28          | 23        | 5        | 0           | 0        |
| October 2013 | B2A04 | 10          | 2         | 4        | 4           | 0        |

| Date         | Plot  | Total Acari | Oribatida | Gamasina | Prostigmata | Asigmata |
|--------------|-------|-------------|-----------|----------|-------------|----------|
| October 2013 | B2A05 | 9           | 2         | 0        | 7           | 0        |
| October 2013 | B2A06 | 8           | 8         | 0        | 0           | 0        |
| October 2013 | B2A08 | 38          | 19        | 3        | 16          | 0        |
| October 2013 | B2A09 | 57          | 19        | 3        | 35          | 0        |
| October 2013 | B2A10 | 29          | 0         | 29       | 0           | 0        |
| October 2013 | B2A12 | 13          | 8         | 4        | 1           | 0        |
| October 2013 | B2A13 | 37          | 0         | 1        | 36          | 0        |
| October 2013 | B2A14 | 41          | 15        | 12       | 14          | 0        |
| October 2013 | B2A15 | 21          | 0         | 1        | 20          | 0        |
| October 2013 | B2A16 | 55          | 3         | 52       | 0           | 0        |
| October 2013 | B2A17 | 34          | 2         | 32       | 0           | 0        |
| October 2013 | B2A18 | 23          | 13        | 4        | 6           | 0        |
| October 2013 | B2A19 | 36          | 11        | 12       | 12          | 1        |
| October 2013 | B2A20 | 1           | 0         | 0        | 1           | 0        |
| October 2013 | B2A21 | 143         | 102       | 33       | 8           | 0        |
| October 2013 | B2A22 | 69          | 48        | 8        | 1           | 12       |
| October 2013 | B3A01 | 41          | 21        | 11       | 9           | 0        |
| October 2013 | B3A02 | 31          | 1         | 28       | 0           | 2        |
| October 2013 | B3A03 | 1           | 0         | 1        | 0           | 0        |
| October 2013 | B3A04 | 33          | 5         | 0        | 9           | 19       |
| October 2013 | B3A05 | 32          | 15        | 5        | 12          | 0        |
| October 2013 | B3A06 | 140         | 33        | 2        | 84          | 21       |
| October 2013 | B3A07 | 63          | 29        | 20       | 14          | 0        |
| October 2013 | B3A08 | 137         | 5         | 3        | 129         | 0        |
| October 2013 | B3A09 | 8           | 2         | 2        | 4           | 0        |
| October 2013 | B3A11 | 234         | 72        | 7        | 155         | 0        |
| October 2013 | B3A12 | 37          | 7         | 0        | 30          | 0        |
| October 2013 | B3A13 | 4           | 1         | 2        | 1           | 0        |
| October 2013 | B3A14 | 64          | 22        | 7        | 22          | 13       |
| October 2013 | B3A16 | 26          | 6         | 3        | 10          | 7        |
| October 2013 | B3A17 | 6           | 0         | 3        | 3           | 0        |
| October 2013 | B3A19 | 31          | 23        | 7        | 1           | 0        |
| October 2013 | B3A20 | 44          | 1         | 7        | 33          | 3        |
| October 2013 | B3A21 | 30          | 3         | 3        | 24          | 0        |
| October 2013 | B3A22 | 40          | 15        | 3        | 22          | 0        |
| October 2013 | B3A23 | 27          | 16        | 8        | 3           | 0        |
| October 2013 | B3A24 | 91          | 22        | 27       | 21          | 21       |
